# Supplementary material for: A Synthesis-Based Reverse Metabolomics Approach for the Discovery of Chemical Structures from Humans and Animals.
Source: Research Square preprint supplement (doi:10.21203/rs.3.rs-820302/v1), 2021-08-30
Supplement: Supplementary file 1 [file 64fc36b386c9f9fe7ade5750.pdf]

## SUPPORTING INFORMATION

Emily C. Gentry<sup>1,2</sup>, Stephanie L. Collins<sup>15</sup>, Morgan Panitchpakdi<sup>1,2</sup>, Pedro Belda-Ferre<sup>3,11</sup>, Allison K. Stewart<sup>8</sup>, Mingxun Wang<sup>1,2</sup>, Alan K. Jarmusch<sup>1,2,14</sup>, Julian Avila-Pacheco<sup>4</sup>, Damian R. Plichta<sup>4</sup>, Allegra T. Aron<sup>1,2</sup>, Hera Vlamakis<sup>4,5</sup>, Ashwin N. Ananthakrishnan<sup>16</sup>, Clary B. Clish<sup>4</sup>, Ramnik J. Xavier<sup>4,5,6,7</sup>, Erin S. Baker<sup>8,9</sup>, Andrew D. Patterson<sup>10</sup>, Rob Knight<sup>3,11-13</sup>, Dionicio Siegel<sup>1</sup>, Pieter C. Dorrestein<sup>1,2\*</sup>

<sup>1</sup> Skaggs School of Pharmacy and Pharmaceutical Sciences, University of California San Diego, La Jolla, San Diego, CA, USA

<sup>2</sup> Collaborative Mass Spectrometry Innovation Center, Skaggs School of Pharmacy and Pharmaceutical Sciences, University of California San Diego, La Jolla, CA, USA

<sup>3</sup> Department of Pediatrics, University of California San Diego, La Jolla, CA, USA

<sup>4</sup> Broad Institute of MIT and Harvard, Cambridge, Massachusetts, USA

<sup>5</sup> Center for Microbiome Informatics and Therapeutics, Massachusetts Institute of Technology, Cambridge, MA 02139, USA

<sup>6</sup> Center for Computational and Integrative Biology Massachusetts General Hospital and Harvard Medical School, Boston, MA 02114, USA

<sup>7</sup> Department of Molecular Biology, Massachusetts General Hospital and Harvard Medical School, Boston, MA 02114, USA

<sup>8</sup> Department of Chemistry, North Carolina State University, Raleigh, NC, USA

<sup>9</sup> Comparative Medicine Institute, North Carolina State University, Raleigh, NC, USA

<sup>10</sup> Center for Molecular Toxicology and Carcinogenesis, Department of Veterinary and Biomedical Sciences, The Pennsylvania State University, University Park, PA, USA

<sup>11</sup> Department of Computer Science, Jacobs School of Engineering, University of California, San Diego, California, USA

<sup>12</sup> Center for Microbiome Innovation, Jacobs School of Engineering, University of California, San Diego, California, USA

<sup>13</sup> Department of Bioengineering, University of California, San Diego, California, USA

<sup>14</sup> Immunity, Inflammation, and Disease Laboratory, Division of Intramural Research, National Institute of Environmental Health Sciences, National Institutes of Health, Research Triangle Park, NC 27709, USA

<sup>15</sup> Department of Biochemistry and Molecular Biology, The Pennsylvania State University, University Park, PA, USA

<sup>16</sup> Division of Gastroenterology, Massachusetts General Hospital, Boston, MA, USA

\* Corresponding author; email: pdorrestein@health.ucsd.edu

## TABLE OF CONTENTS

**S1-S4: Supplementary Methods**

**S5-S8: Supplementary Tables**

**S8-S28: Supplementary Figures**

**S29-S38: Supplementary Data**

**S39: Supplementary References**

## **Supplementary Methods**

### **Media preparation**

Fecal culture medium (FCM) was prepared according to a protocol by McDonald *et al.*<sup>1</sup> autoclaving for 20 min at 121 °C. The media was brought into an anaerobic chamber and left overnight with the lid slightly ajar to remove any remaining oxygen from the media. Then, an aqueous solution of L-cysteine was pushed through a 0.2µm syringe filter into the media solution for a concentration of 0.5% L-Cysteine (w/v) to maintain anoxic solution.

### **Data analysis of HMP culture extracts**

MS1 feature detection and MS/MS pairing was performed using MZmine 2.37corr17.7\_kai\_merge2<sup>2,3</sup>. An intensity threshold of 1E3 and 50 were set for MS1 and MS2 detection, respectively, with centroid data. MS1 chromatogram construction was performed using the ADAP chromatogram builder, where the minimum group size was set to 3, group intensity threshold was 1E3, minimum highest intensity was 3E3, and mass tolerance was 0.01 *m/z* or 20ppm. Chromatogram deconvolution was then performed using a local minimum search algorithm with a chromatographic threshold of 90%, a search minimum in retention time (RT) range of 0.2 min, minimum relative height of 1%, minimum absolute threshold height of 3E3, minimum ratio for top/edge of 1, and a peak duration of 0.01-2 min. Pairing between MS1 and MS2 was performed with a mass tolerance of 0.01 *m/z* or 20ppm and RT range of 0.3 min. Isotope peaks were grouped, then features from different samples were aligned using the same mass and RT tolerances; alignment was performed by placing a weight of 75 on *m/z* and 25 on RT. A peak area feature table was exported as a .csv file and consensus MS/MS spectral data were exported in .mgf format.

### **Synthesis of pure conjugated bile acids**

**Materials:** Organic solutions were concentrated under reduced pressure on a Büchi rotary evaporator using a water bath. Chromatographic purification of products was accomplished by flash chromatography on Silicycle F60 silica gel. All reactions were carried out in well ventilated fume hoods. Thin-layer chromatography (TLC) was performed on Silicycle 250 µm silica gel plates. Visualization of the developed chromatogram was performed by irradiation with 254 nm UV light or treatment with a solution of ceric ammonium molybdate stain followed by heating. Yields refer to purified compounds unless otherwise noted.

**Instrumentation:** <sup>1</sup>H and <sup>13</sup>C NMR spectra were recorded on a Bruker 600 (600 and 151 MHz for <sup>1</sup>H and <sup>13</sup>C, respectively) instrument, and are internally referenced to residual protiosolvent signals of CD<sub>3</sub>OD at δ 3.31 and 49.0 ppm and (CD<sub>3</sub>)<sub>2</sub>SO at δ 2.50 and 39.51 ppm. Data for <sup>1</sup>H NMR are reported as follows: chemical shift (δ ppm), integration, multiplicity (s = singlet, br s = broad singlet, d = doublet, t = triplet, q = quartet, m = multiplet), and coupling constant (Hz). Data for <sup>13</sup>C NMR are reported in terms of chemical shift and no special nomenclature is used for equivalent carbons.

**Glutamate conjugated cholic acid (Glu-CA):** NaHCO<sub>3</sub> was used as the inorganic base. Product was purified using 6-18% CH<sub>3</sub>OH in CH<sub>2</sub>Cl<sub>2</sub> with 1% acetic acid to obtain a 21% isolated yield as an off-white amorphous solid. <sup>1</sup>H NMR (600 MHz, CD<sub>3</sub>OD) δ 4.37 (dd, *J* = 8.8, 5.0 Hz, 1H), 3.96

(t,  $J = 3.0$  Hz, 1H), 3.80 (q,  $J = 3.0$  Hz, 1H), 3.37 (tt,  $J = 11.2, 4.4$  Hz, 1H), 2.38 (t,  $J = 7.7$  Hz, 2H), 2.37 – 2.22 (m, 3H), 2.18 (ddd,  $J = 13.4, 9.3, 6.6$  Hz, 2H), 2.05 – 1.78 (m, 6H), 1.79 – 1.70 (m, 1H), 1.69 – 1.62 (m, 1H), 1.63 – 1.50 (m, 5H), 1.49 – 1.29 (m, 6H), 1.12 (qd,  $J = 11.8, 5.7$  Hz, 1H), 1.04 (d,  $J = 6.5$  Hz, 3H), 0.98 (td,  $J = 14.2, 3.5$  Hz, 1H), 0.92 (s, 3H), 0.72 (s, 3H);  $^{13}\text{C}$  NMR (151 MHz,  $(\text{CD}_3)_2\text{SO}$ )  $\delta$  174.41, 172.68, 71.17, 70.57, 66.38, 51.74, 46.31, 45.86, 41.61, 41.46, 35.40, 35.29, 34.97, 34.49, 32.55, 31.82, 31.04, 31.00, 30.47, 28.63, 27.43, 27.24, 26.30, 22.93, 22.72, 17.23, 12.45; HRMS (ESI) exact mass calculated for  $[\text{M}+\text{H}]^+$  ( $\text{C}_{29}\text{H}_{48}\text{NO}_8$ ) requires  $m/z$  538.3375, found 538.3376 with a difference of 0.19 ppm.

Glutamate conjugated chenodeoxycholic acid (Glu-CDCA):  $\text{NaHCO}_3$  was used as the inorganic base. Product was purified using 6-12%  $\text{CH}_3\text{OH}$  in  $\text{CH}_2\text{Cl}_2$  with 1% acetic acid to obtain a 50% yield as an off-white amorphous solid.  $^1\text{H}$  NMR (600 MHz,  $\text{CD}_3\text{OD}$ )  $\delta$  4.37 (t,  $J = 6.7$  Hz, 1H), 3.79 (t,  $J = 3.3$  Hz, 1H), 3.37 (tt,  $J = 10.5, 4.2$  Hz, 1H), 2.38 (t,  $J = 7.5$  Hz, 2H), 2.35 – 2.22 (m, 2H), 2.21 – 2.12 (m, 2H), 2.03 – 1.99 (m, 1H), 1.97 – 1.80 (m, 5H), 1.74 (dt,  $J = 13.3, 8.0$  Hz, 1H), 1.69 – 1.58 (m, 2H), 1.54 – 1.45 (m, 5H), 1.39 – 1.27 (m, 7H), 1.23 – 1.15 (m, 2H), 1.15 – 1.06 (m, 1H), 0.99 (d,  $J = 6.1$  Hz, 3H), 0.93 (s, 3H), 0.70 (s, 3H);  $^{13}\text{C}$  NMR (151 MHz,  $(\text{CD}_3)_2\text{SO}$ )  $\delta$  174.34, 172.57, 70.43, 66.27, 55.71, 51.68, 50.08, 42.00, 41.49, 40.82, 35.37, 35.11, 34.88, 34.81, 32.37, 32.32, 31.67, 30.87, 30.59, 27.89, 27.13, 23.25, 22.79, 20.33, 18.43, 11.73; HRMS (ESI) exact mass calculated for  $[\text{M}+\text{H}]^+$  ( $\text{C}_{29}\text{H}_{48}\text{NO}_7$ ) requires  $m/z$  522.3426, found 522.3423 with a difference of 0.57 ppm.

Glutamate conjugated deoxycholic acid (Glu-DCA):  $\text{NaHCO}_3$  was used as the inorganic base. Product was purified using 6-12%  $\text{CH}_3\text{OH}$  in  $\text{CH}_2\text{Cl}_2$  with 1% acetic acid to obtain a 55% yield as an off-white amorphous solid.  $^1\text{H}$  NMR (600 MHz,  $\text{CD}_3\text{OD}$ )  $\delta$  4.37 (dd,  $J = 8.4, 4.8$  Hz, 1H), 3.96 (t,  $J = 3.1$  Hz, 1H), 3.57 – 3.48 (m, 1H), 2.38 (t,  $J = 7.6$  Hz, 2H), 2.35 – 2.29 (m, 1H), 2.21 – 2.12 (m, 2H), 1.96 – 1.75 (m, 8H), 1.66 – 1.57 (m, 3H), 1.55 – 1.50 (m, 2H), 1.48 – 1.23 (m, 9H), 1.17 (qd,  $J = 13.0, 3.9$  Hz, 1H), 1.09 (dd,  $J = 12.1, 5.8$  Hz, 1H), 1.03 (d,  $J = 6.5$  Hz, 3H), 0.98 (td,  $J = 14.1, 3.4$  Hz, 1H), 0.93 (s, 3H), 0.71 (s, 3H);  $^{13}\text{C}$  NMR (151 MHz,  $(\text{CD}_3)_2\text{SO}$ )  $\delta$  174.36, 174.08, 172.70, 71.16, 70.07, 51.71, 47.55, 46.35, 46.08, 41.70, 36.34, 35.75, 35.22, 35.18, 33.91, 33.02, 32.48, 31.76, 30.84, 30.28, 28.68, 27.32, 27.08, 27.08, 26.20, 23.61, 23.18, 17.18, 12.54; HRMS (ESI) exact mass calculated for  $[\text{M}+\text{H}]^+$  ( $\text{C}_{29}\text{H}_{48}\text{NO}_7$ ) requires  $m/z$  522.3426, found 522.3427 with a difference of 0.19 ppm.

Isoleucine conjugated cholic acid (Ile-CA): Purified according to literature procedure<sup>4</sup> and characterization data is consistent with reported data.

Leucine conjugated cholic acid (Leu-CA): Purified according to literature procedure<sup>4</sup> and characterization data is consistent with reported data.

Methionine conjugated chenodeoxycholic acid (Met-CDCA):  $\text{NaHCO}_3$  was used as the inorganic base. Product was purified using 3-6%  $\text{CH}_3\text{OH}$  in  $\text{CH}_2\text{Cl}_2$  with 1% acetic acid to obtain a 79% yield as a white amorphous solid.  $^1\text{H}$  NMR 600 MHz,  $\text{CD}_3\text{OD}$ )  $\delta$  4.53 (dd,  $J = 9.3, 4.6$  Hz, 1H), 3.79 (q,  $J = 2.9$  Hz, 1H), 3.37 (tt,  $J = 10.9, 4.2$  Hz, 1H), 2.62 – 2.47 (m, 2H), 2.36 – 2.23 (m, 2H), 2.21 – 2.10 (m, 2H), 2.09 (s, 3H), 2.05 – 1.79 (m, 7H), 1.78 – 1.70 (m, 1H), 1.68 – 1.59 (m, 2H),

1.56 – 1.42 (m, 5H), 1.40 – 1.27 (m, 5H), 1.24 – 1.15 (m, 2H), 1.14-1.06 (m, 1H), 1.03 – 0.94 (m, 4H), 0.93 (s, 3H), 0.69 (s, 3H); <sup>13</sup>C NMR (151 MHz, CD<sub>3</sub>OD) δ 176.93, 175.25, 72.83, 69.05, 57.34, 52.54, 51.50, 43.66, 43.12, 41.02, 40.73, 40.41, 36.80, 36.54, 36.19, 35.86, 34.01, 33.81, 33.21, 32.10, 31.32, 31.29, 29.28, 24.62, 23.42, 21.78, 18.94, 15.24, 12.23; HRMS (ESI) exact mass calculated for [M+H]<sup>+</sup> (C<sub>29</sub>H<sub>50</sub>NO<sub>5</sub>S) requires m/z 524.3404, found 524.3406 with a difference of 0.38 ppm.

Methionine conjugated deoxycholic acid (Met-DCA): NaHCO<sub>3</sub> was used as the inorganic base. Product was purified using 3-6% CH<sub>3</sub>OH in CH<sub>2</sub>Cl<sub>2</sub> with 1% acetic acid to obtain a 76% yield as a white amorphous solid. <sup>1</sup>H NMR (600 MHz, CD<sub>3</sub>OD) δ 4.53 (dd, *J* = 9.3, 4.6 Hz, 1H), 3.96 (t, *J* = 3.0 Hz, 1H), 3.53 (tt, *J* = 11.2, 4.6 Hz, 1H), 2.62 – 2.55 (m, 1H), 2.55 – 2.48 (m, 1H), 2.37 – 2.28 (m, 1H), 2.24 – 2.10 (m, 2H), 2.09 (s, 3H), 1.99 – 1.93 (m, 1H), 1.93 – 1.73 (m, 7H), 1.65 – 1.57 (m, 3H), 1.57 – 1.49 (m, 2H), 1.49 – 1.37 (m, 6H), 1.36 – 1.30 (m, 1H), 1.30 – 1.25 (m, 2H), 1.22 – 1.06 (m, 2H), 1.03 (d, *J* = 6.5 Hz, 3H), 0.98 (td, *J* = 14.2, 3.2 Hz, 1H), 0.93 (s, 3H), 0.71 (s, 3H). <sup>13</sup>C NMR (151 MHz, CD<sub>3</sub>OD) δ 177.0099, 175.27, 74.06, 72.52, 52.54, 49.24, 48.11, 47.54, 43.58, 37.42, 37.15, 36.72, 36.41, 35.27, 34.78, 33.80, 33.17, 32.11, 31.27, 31.01, 29.86, 28.67, 28.38, 27.43, 24.86, 23.72, 17.68, 15.22, 13.24; HRMS (ESI) exact mass calculated for [M+H]<sup>+</sup> (C<sub>29</sub>H<sub>50</sub>NO<sub>5</sub>S) requires m/z 524.3404, found 524.3405 with a difference of 0.19 ppm.

Phenylalanine conjugated cholic acid (Phe-CA): Purified according to literature procedure<sup>4</sup> and characterization data is consistent with reported data.

Phenylalanine conjugated chenodeoxycholic acid (Phe-CDCA): NaHCO<sub>3</sub> was used as the inorganic base. Product was purified using 3-6% CH<sub>3</sub>OH in CH<sub>2</sub>Cl<sub>2</sub> with 1% acetic acid to obtain a 94% yield as a white amorphous solid. <sup>1</sup>H NMR (600 MHz, CD<sub>3</sub>OD) δ 7.29 – 7.17 (m, 5H), 4.64 (dd, *J* = 9.5, 4.9 Hz, 1H), 3.79 (q, *J* = 2.9 Hz, 1H), 3.41 – 3.33 (m, 1H), 3.22 (dd, *J* = 14.0, 4.8 Hz, 1H), 2.93 (dd, *J* = 13.9, 9.5 Hz, 1H), 2.27 (q, *J* = 11.7 Hz, 1H), 2.23 – 2.17 (m, 1H), 2.10 – 2.03 (m, 1H), 1.98 – 1.94 (m, 1H), 1.90 – 1.81 (m, 3H), 1.76 – 1.59 (m, 4H), 1.55 – 1.43 (m, 4H), 1.40 – 1.27 (m, 5H), 1.26 – 1.04 (m, 5H), 1.02 – 0.94 (m, 1H), 0.94 – 0.91 (m, 6H), 0.66 (s, 3H); <sup>13</sup>C NMR (151 MHz, (CD<sub>3</sub>)<sub>2</sub>SO) δ 173.41, 172.64, 137.99, 129.15, 128.10, 126.32, 70.41, 66.23, 55.60, 53.59, 50.05, 41.94, 41.47, 36.87, 35.36, 35.01, 34.87, 34.78, 32.34, 32.15, 31.54, 30.59, 27.79, 23.22, 22.77, 20.31, 18.35, 11.70; HRMS (ESI) exact mass calculated for [M+H]<sup>+</sup> (C<sub>33</sub>H<sub>50</sub>NO<sub>5</sub>) requires m/z 540.3684, found 540.3683 with a difference of 0.19 ppm.

Phenylalanine conjugated deoxycholic acid (Phe-DCA): NaHCO<sub>3</sub> was used as the inorganic base. Product was purified using 3-6% CH<sub>3</sub>OH in CH<sub>2</sub>Cl<sub>2</sub> with 1% acetic acid to obtain a 99% yield as a white amorphous solid. <sup>1</sup>H NMR (600 MHz, CD<sub>3</sub>OD) δ 7.30 – 7.17 (m, 5H), 4.65 (dd, *J* = 9.3, 4.9 Hz, 1H), 3.94 (t, *J* = 3.0 Hz, 1H), 3.57 – 3.48 (m, 1H), 3.21 (dd, *J* = 13.9, 4.9 Hz, 1H), 2.94 (dd, *J* = 13.9, 9.3 Hz, 1H), 2.25 – 2.17 (m, 1H), 2.11 – 2.03 (m, 1H), 1.95 – 1.84 (m, 2H), 1.85 – 1.74 (m, 4H), 1.71 – 1.62 (m, 1H), 1.64 – 1.55 (m, 3H), 1.54 – 1.48 (m, 2H), 1.50 – 1.32 (m, 6H), 1.31 – 1.24 (m, 1H), 1.24 – 1.11 (m, 3H), 1.12 – 1.01 (m, 1H), 1.02 – 0.93 (m, 4H), 0.93 (s, 3H), 0.67 (s, 3H); <sup>13</sup>C NMR (151 MHz, (CD<sub>3</sub>)<sub>2</sub>SO) δ 173.42, 172.74, 137.97, 129.15, 128.11, 126.33, 71.11, 70.04, 53.56, 48.66, 47.52, 46.22, 46.01, 41.68, 36.86, 36.33, 35.72, 35.21, 35.08, 33.87, 32.98, 32.27, 31.63, 30.27, 28.66, 27.21, 27.05, 26.18, 23.57, 23.14, 21.14, 17.10, 12.49; HRMS

(ESI) exact mass calculated for  $[M+H]^+$  ( $C_{33}H_{50}NO_5$ ) requires  $m/z$  540.3684, found 540.3684 with a difference of 0.00 ppm.

Threonine conjugated cholic acid (Thr-CA):  $NaHCO_3$  was used as the inorganic base. Product was purified using 6-12%  $CH_3OH$  in  $CH_2Cl_2$  with 1% acetic acid to obtain a 97% yield as a white amorphous solid.  $^1H$  NMR (600 MHz,  $CD_3OD$ )  $\delta$  4.37 (s, 1H), 4.28 (s, 1H), 3.96 (t,  $J = 3.0$  Hz, 1H), 3.80 (q,  $J = 3.0$  Hz, 1H), 3.37 (tt,  $J = 11.4, 4.5$  Hz, 1H), 2.39 (ddd,  $J = 14.7, 10.1, 5.1$  Hz, 1H), 2.33 – 2.19 (m, 3H), 2.04 – 1.96 (m, 2H), 1.96 – 1.79 (m, 4H), 1.78 – 1.71 (m, 1H), 1.68 – 1.63 (m, 1H), 1.63 – 1.51 (m, 5H), 1.48 – 1.28 (m, 5H), 1.18 (d,  $J = 6.3$  Hz, 3H), 1.16 – 1.07 (m, 1H), 1.05 (d,  $J = 6.5$  Hz, 3H), 0.98 (td,  $J = 14.2, 3.5$  Hz, 1H), 0.92 (s, 3H), 0.72 (s, 3H).  $^{13}C$  NMR (151 MHz,  $CD_3OD$ )  $\delta$  176.98, 74.04, 72.86, 69.08, 68.75, 48.08, 47.48, 43.15, 42.96, 40.97, 40.42, 36.91, 36.46, 35.87, 35.82, 34.08, 33.21, 31.14, 29.52, 28.68, 27.84, 24.22, 23.14, 20.26, 17.77, 13.00;  $^{13}C$  NMR (151 MHz,  $(CD_3)_2SO$ )  $\delta$  173.13, 71.28, 70.66, 66.73, 66.47, 46.41, 45.93, 41.67, 41.52, 35.46, 35.43, 35.02, 34.55, 32.72, 31.97, 30.50, 28.67, 27.51, 26.36, 23.01, 22.77, 19.92, 17.29, 12.52; HRMS (ESI) exact mass calculated for  $[M+H]^+$  ( $C_{28}H_{48}NO_7$ ) requires  $m/z$  510.3426, found 510.3424 with a difference of 0.39 ppm.

Tyrosine conjugated cholic acid (Tyr-CA): Purified according to literature procedure<sup>4</sup> and characterization data is consistent with reported data.

Tyrosine conjugated chenodeoxycholic acid (Tyr-CDCA):  $NaOH$  was used as the inorganic base. Product was purified using 3-12%  $CH_3OH$  in  $CH_2Cl_2$  with 1% acetic acid to obtain a 74% yield as a white amorphous solid.  $^1H$  NMR (600 MHz,  $CD_3OD$ )  $\delta$  7.03 (d,  $J = 8.5$  Hz, 2H), 6.69 (d,  $J = 8.5$  Hz, 2H), 4.58 (dd,  $J = 9.3, 4.9$  Hz, 1H), 3.80 (q,  $J = 3.0$  Hz, 1H), 3.41 – 3.33 (m, 1H), 3.11 (dd,  $J = 14.0, 4.9$  Hz, 1H), 2.84 (dd,  $J = 14.0, 9.3$  Hz, 1H), 2.31 – 2.17 (m, 2H), 2.11 – 2.02 (m, 1H), 2.02 – 1.93 (m, 2H), 1.91 – 1.81 (m, 3H), 1.77 – 1.58 (m, 4H), 1.55 – 1.43 (m, 4H), 1.43 – 1.04 (m, 9H), 0.98 (td,  $J = 14.2, 3.4$  Hz, 1H), 0.93 (t,  $J = 3.3$  Hz, 6H), 0.67 (s, 3H).  $^{13}C$  NMR (151 MHz,  $CD_3OD$ )  $\delta$  176.67, 175.21, 157.21, 131.22, 129.19, 116.15, 72.85, 69.10, 57.31, 55.23, 51.49, 43.64, 43.13, 41.01, 40.72, 40.43, 37.62, 36.80, 36.52, 36.19, 35.85, 34.02, 33.84, 33.23, 31.32, 29.20, 24.61, 23.38, 21.76, 18.85, 12.17; HRMS (ESI) exact mass calculated for  $[M+H]^+$  ( $C_{33}H_{50}NO_6$ ) requires  $m/z$  556.3633, found 556.3634 with a difference of 0.18 ppm.

## Supplementary Tables

**Supplementary Table 1: Number of unique spectral matches per compound for Q-ToF data in positive ionization mode.**

|         | aMCA | bMCA | CA   | CDCA | DCA  | gMCA | HDCA | UDCA |
|---------|------|------|------|------|------|------|------|------|
| Ala     | 241  | 4    | 342  | 418  | 420  | 74   | 264  | 40   |
| Arg     | 180  | 101  | 409  | 38   | 38   | 103  | 44   | 72   |
| Asn     | 152  | 159  | 55   | 2    | 35   | 159  | 0    | 2    |
| Asp     | 39   | 36   | 39   | 0    | 8    | 39   | 2    | 0    |
| Cit     | 33   | 33   | 64   | 224  | 226  | 33   | 224  | 224  |
| Cys     | 0    | N/A  | 4    | 0    | 0    | 0    | 0    | 0    |
| DOPA    | 0    | 0    | 0    | 0    | 0    | 0    | 0    | 0    |
| Gln     | 13   | 8    | 20   | 4    | 4    | 11   | 4    | 4    |
| Glu     | 77   | 48   | 181  | 164  | 170  | 76   | 137  | N/A  |
| His     | 720  | 673  | 605  | 242  | 239  | 724  | 244  | 244  |
| Ile/Leu | 982  | 601  | 757  | 1563 | 1590 | 920  | 1376 | 1420 |
| Lys     | 1181 | 963  | 1250 | 551  | 579  | 672  | 548  | 626  |
| Met     | 115  | 115  | 10   | 204  | 214  | 115  | 217  | 207  |
| Orn     | 305  | 199  | 215  | 80   | 83   | 203  | 73   | 84   |
| Phe     | 1658 | 1453 | 1507 | 2629 | 2629 | 1544 | 2517 | 2624 |
| Pro     | 0    | 0    | 0    | 0    | 0    | 0    | 0    | 0    |
| Ser     | 1    | 3    | 44   | 30   | 32   | 24   | 30   | 30   |
| Thr     | 349  | 328  | 139  | 7    | 22   | 340  | 0    | 0    |
| Trp     | 446  | 420  | 518  | 1286 | 1286 | 502  | 1283 | 1283 |
| Tyr     | 568  | 465  | 563  | 431  | 431  | 534  | 412  | 436  |
| Val     | 0    | 0    | 48   | 8    | 4    | 0    | 4    | 4    |

**Supplementary Table 2: Number of unique spectral matches per compound for QE data in positive ionization mode.**

|         | aMCA | bMCA | CA   | CDCA | DCA  | gMCA | HDCA | UDCA |
|---------|------|------|------|------|------|------|------|------|
| Ala     | 27   | 27   | 68   | 139  | 301  | 27   | 165  | 45   |
| Arg     | 217  | 235  | 366  | 46   | 51   | 217  | 46   | 48   |
| Asn     | 152  | 152  | 28   | 6    | 4    | 152  | 4    | 4    |
| Asp     | 36   | 36   | 3    | 2    | 8    | 36   | 2    | 2    |
| Cit     | 2    | 2    | 34   | 188  | 187  | 2    | 188  | 188  |
| Cys     | N/A  | N/A  | N/A  | N/A  | 0    | N/A  | N/A  | N/A  |
| DOPA    | 0    | 0    | 0    | 0    | 0    | 0    | 0    | 0    |
| Gln     | 8    | 2    | 15   | 2    | 2    | 8    | 2    | 2    |
| Glu     | 51   | 36   | 113  | 149  | 178  | 111  | 136  | N/A  |
| His     | 595  | 591  | 595  | 244  | 244  | 595  | 244  | 225  |
| Ile/Leu | 595  | 574  | 712  | 1476 | 1548 | 584  | 1434 | 1414 |
| Lys     | 517  | 464  | 856  | 548  | 570  | 141  | 542  | 548  |
| Met     | 115  | 97   | 10   | 199  | 198  | 115  | 198  | 198  |
| Orn     | 203  | 196  | 422  | 80   | 83   | 23   | 36   | 83   |
| Phe     | 1509 | 639  | 1407 | 2513 | 2513 | 1274 | 2450 | 2526 |
| Pro     | 0    | 0    | 0    | 0    | 0    | 0    | 0    | 0    |
| Ser     | 8    | 4    | 37   | 36   | 32   | 11   | 28   | 30   |
| Thr     | 231  | 235  | 108  | 5    | 35   | 229  | 5    | 10   |
| Trp     | 499  | 471  | 506  | 1283 | 1284 | 495  | 1268 | 1283 |
| Tyr     | 486  | 361  | 563  | 333  | 324  | 355  | 310  | 333  |
| Val     | 0    | 15   | 16   | 26   | 42   | 0    | 4    | 4    |

**Supplementary Table 3: Number of unique spectral matches per compound for Q-ToF data in negative ionization mode.** There is very little negative mode data in the public domain resulting in very few matches.

|         | aMCA | bMCA | CA | CDCA | DCA | gMCA | HDCA | UDCA |
|---------|------|------|----|------|-----|------|------|------|
| Ala     | 0    | 0    | 0  | 0    | 0   | 0    | 0    | 0    |
| Arg     | 0    | 0    | 0  | 0    | 0   | 0    | 0    | 0    |
| Asn     | 0    | 0    | 0  | 0    | 2   | 0    | 0    | 0    |
| Asp     | 0    | 0    | 0  | 0    | 0   | 0    | 0    | 0    |
| Cit     | 0    | 0    | 0  | 0    | 0   | 0    | 0    | 0    |
| Cys     | 0    | 0    | 0  | 0    | 0   | 0    | 0    | 0    |
| DOPA    | 0    | 0    | 0  | 0    | 0   | 0    | 0    | 0    |
| Gln     | 0    | 0    | 0  | 0    | 0   | 0    | 0    | 0    |
| Glu     | 0    | 0    | 0  | 0    | 0   | 0    | 0    | 0    |
| His     | 0    | 0    | 0  | 0    | 0   | 0    | 0    | 0    |
| Ile/Leu | 0    | 0    | 0  | 0    | 0   | 0    | 0    | 0    |
| Lys     | 0    | 0    | 0  | 0    | 0   | 0    | 0    | 0    |
| Met     | 0    | 0    | 0  | 0    | 0   | 0    | 0    | 0    |
| Orn     | 0    | 0    | 0  | 0    | 0   | 0    | 0    | 0    |
| Phe     | 0    | 0    | 0  | 0    | 0   | 0    | 0    | 4    |
| Pro     | 0    | 0    | 0  | 0    | 0   | 0    | 0    | 0    |
| Ser     | 0    | 0    | 0  | 0    | 0   | 0    | 0    | 0    |
| Thr     | 0    | 0    | 0  | 0    | 0   | 0    | 0    | 0    |
| Trp     | 0    | 0    | 0  | 0    | 0   | 0    | 0    | 0    |
| Tyr     | 0    | 0    | 0  | 0    | 0   | 0    | 0    | 2    |
| Val     | 0    | 0    | 0  | 0    | 0   | 0    | 0    | 0    |



**Supplementary Table 4: Organisms, bile acids and intensities. Provided in separate extended tables.**

**Supplementary Table 5: Universal spectrum identifiers and MASST job links for all conjugated BAs in synthetic mixtures. Provided in separate extended tables.**

**Supplementary Figures**

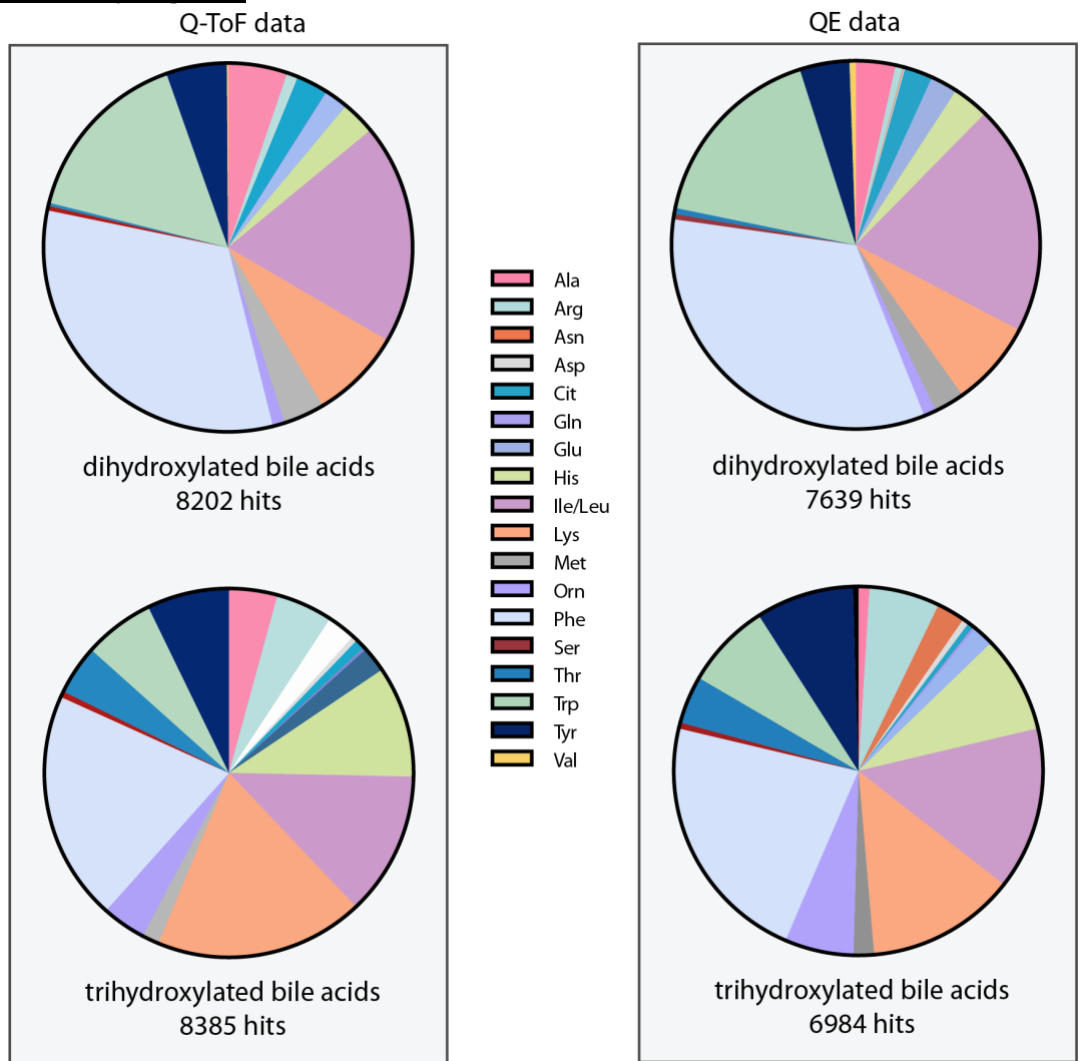

**Supplementary Fig. 1: Comparison of amino acid distributions for MASST searches of Orbitrap (Thermo QE) vs. Q-ToF (Bruker MaXis) data in positive ionization mode.**

259 All mirror plots were produced with Metabolomics Spectral Resolver available at  
 260 <https://metabolomics-usi.ucsd.edu/><sup>5</sup>.

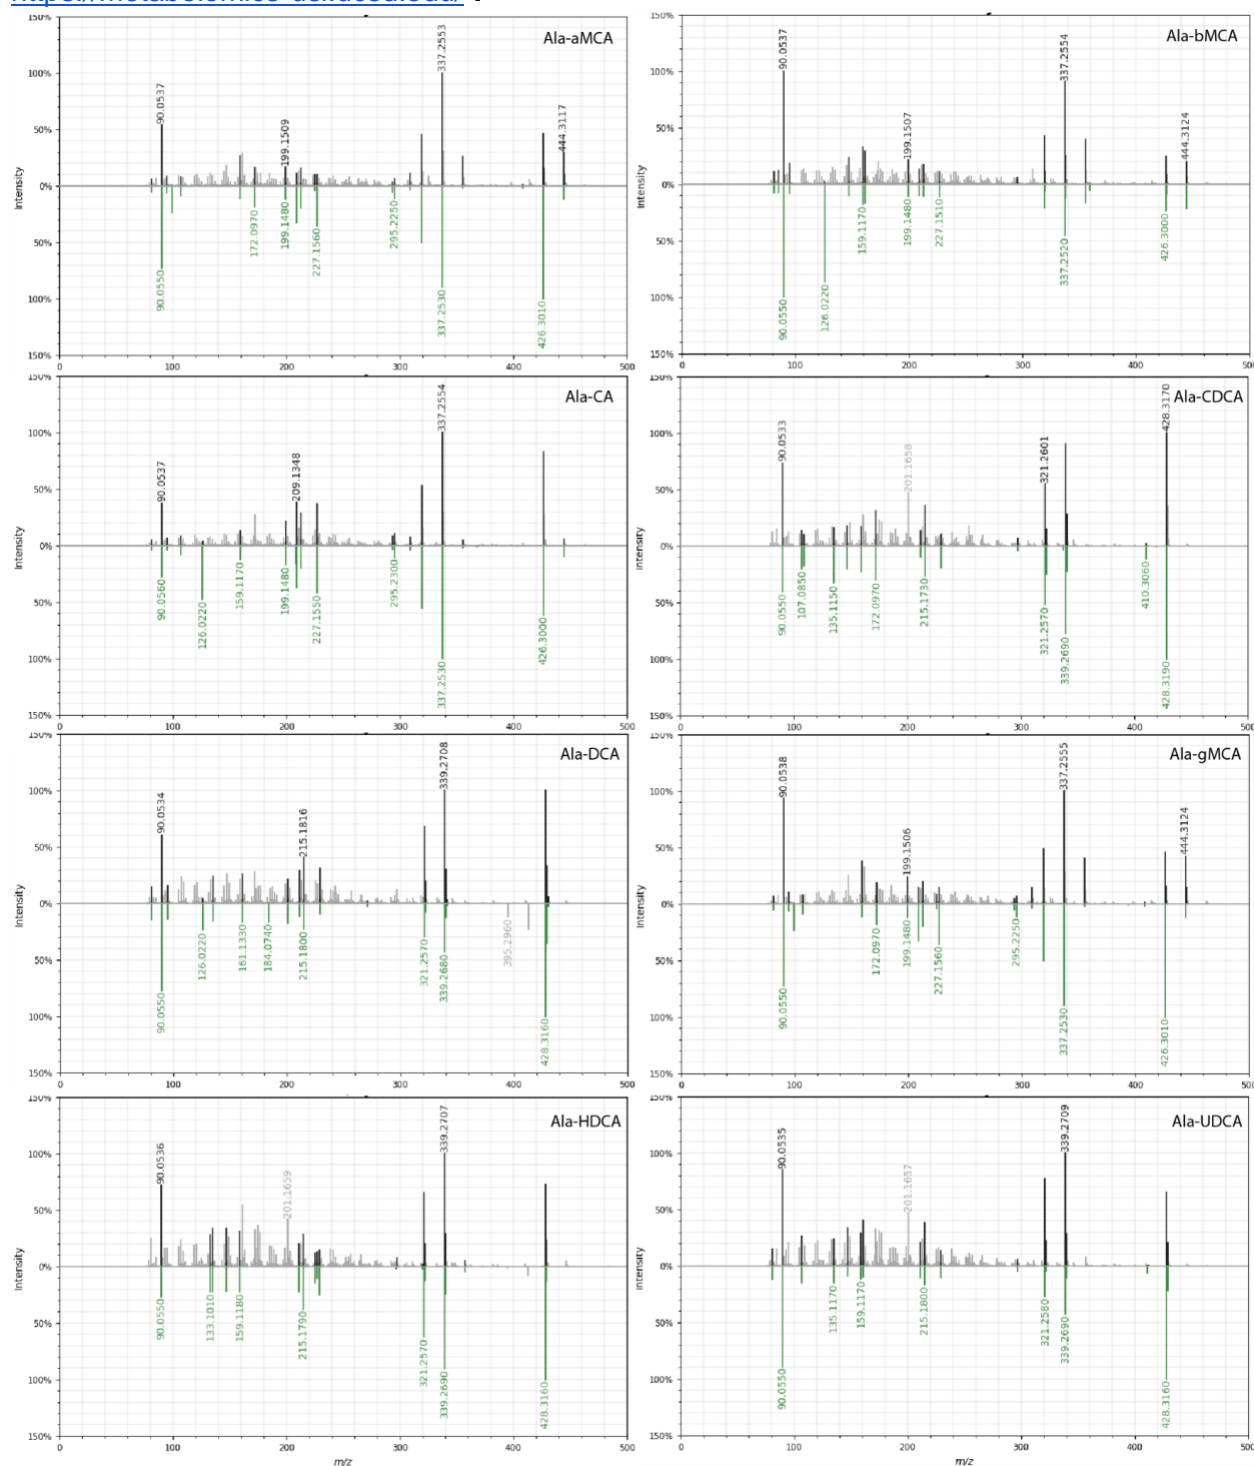

Supplementary Fig. 2: Mirror plots for MS/MS matches to Ala conjugated bile acids.

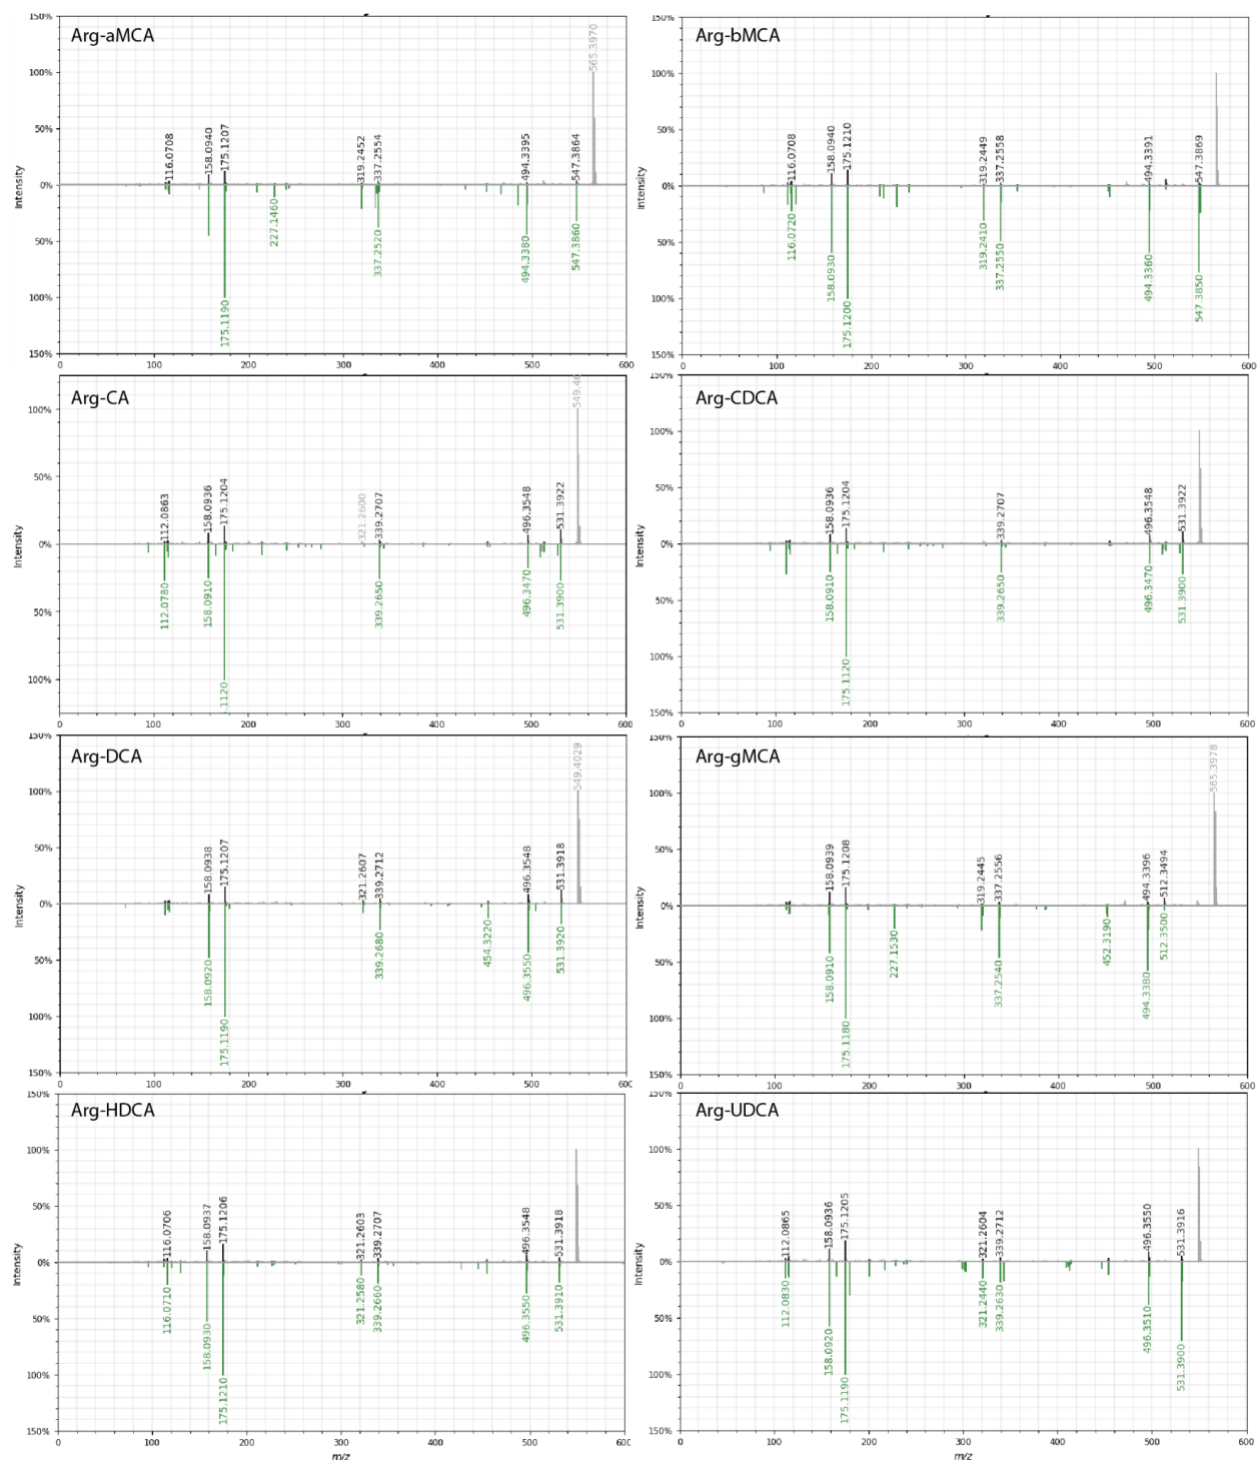

Supplementary Fig. 3: Mirror plots for MS/MS matches to Arg conjugated bile acids.

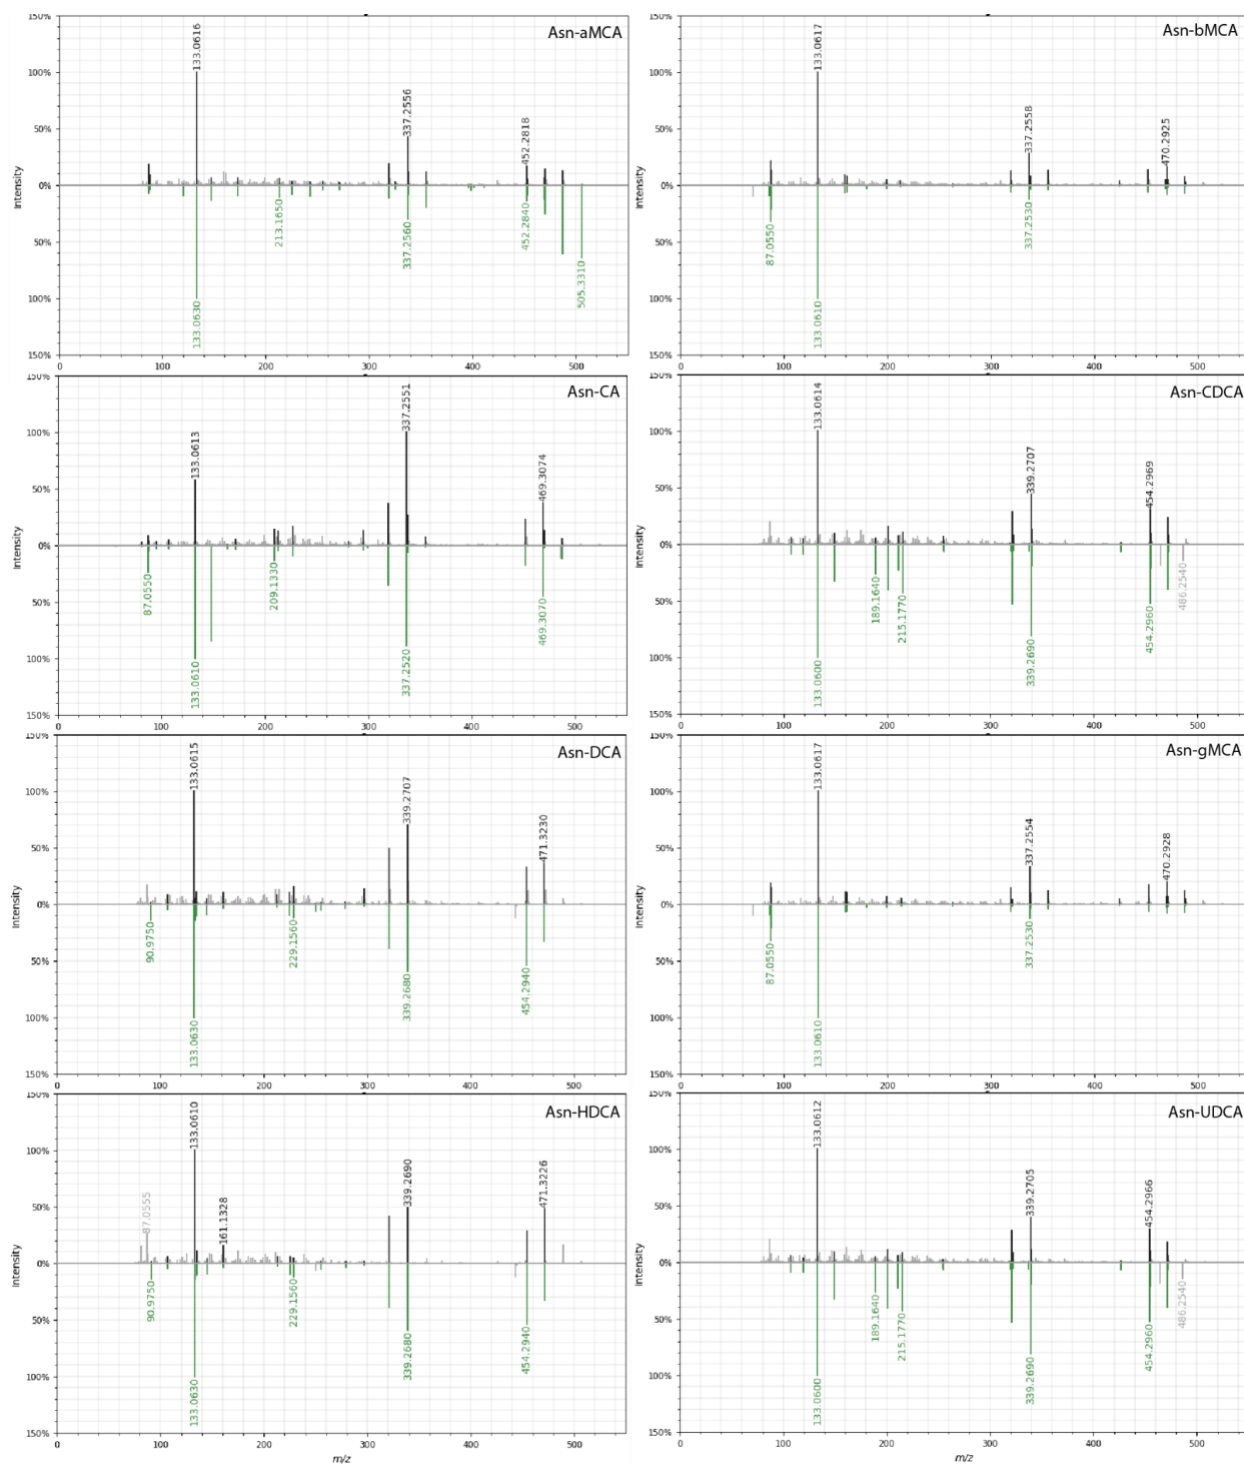

**Supplementary Fig. 4: Mirror plots for MS/MS matches to Asn conjugated bile acids.**

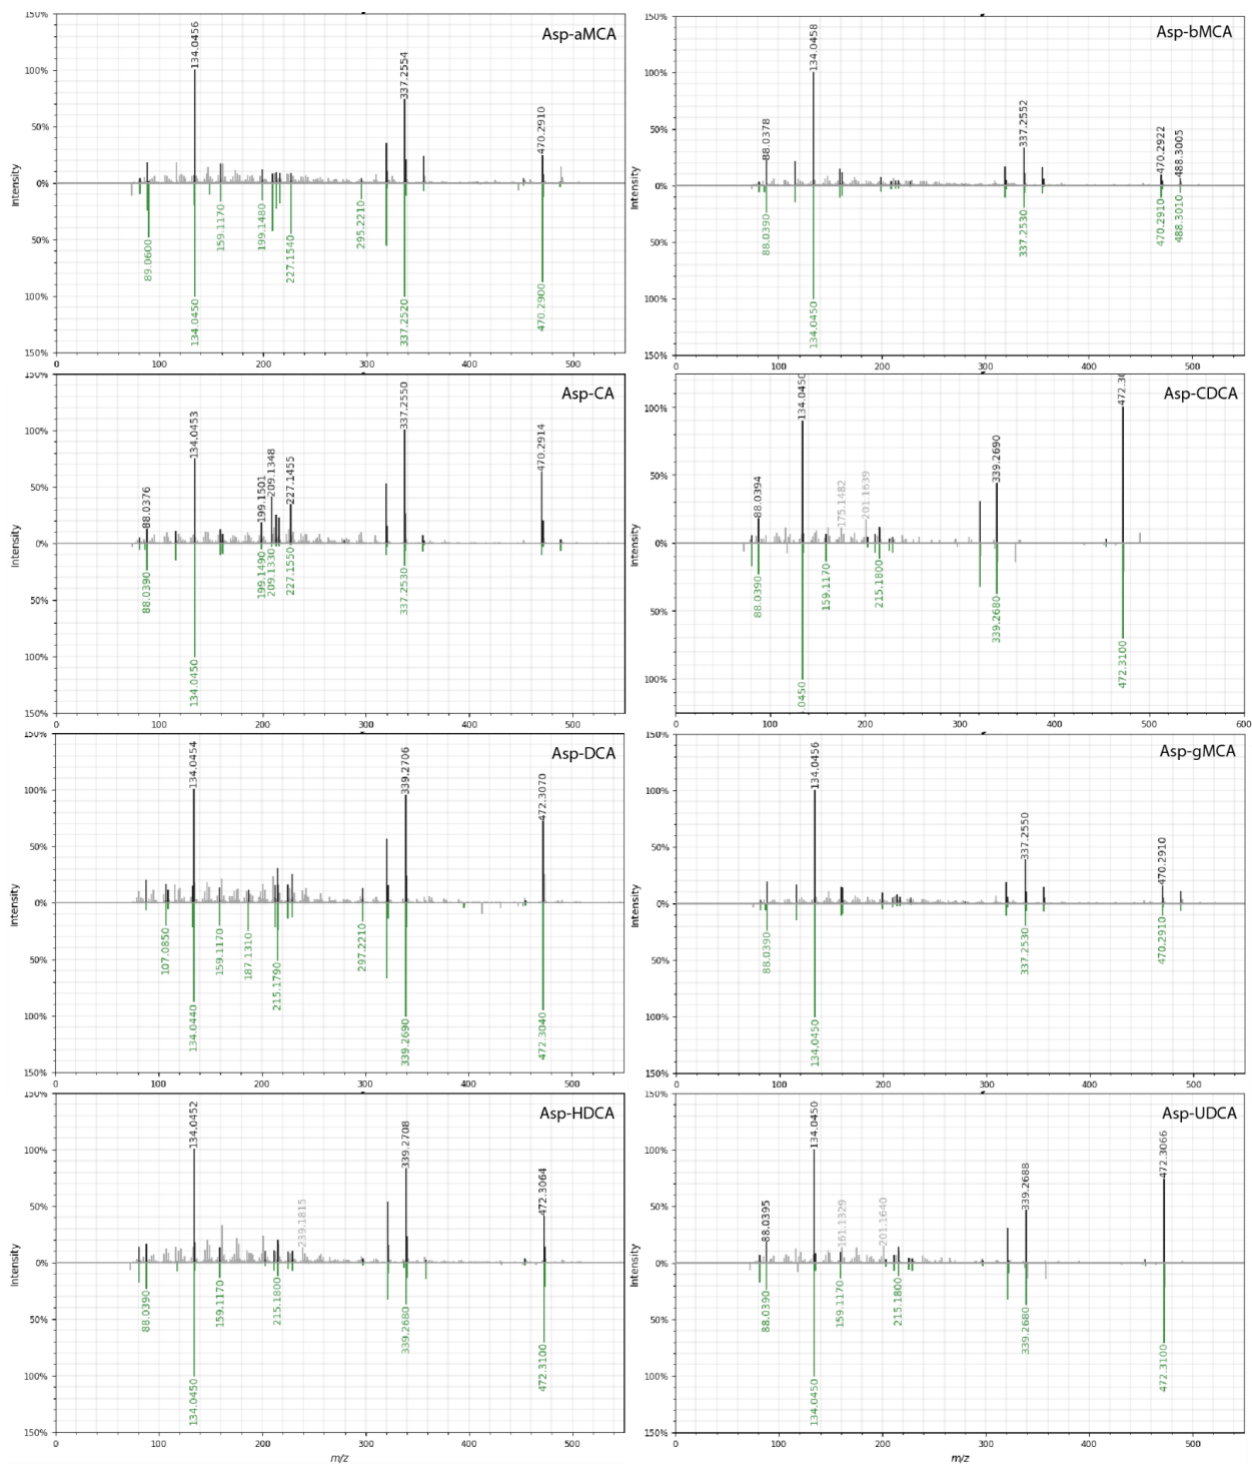

**Supplementary Fig. 5: Mirror plots for MS/MS matches to Asp conjugated bile acids.**

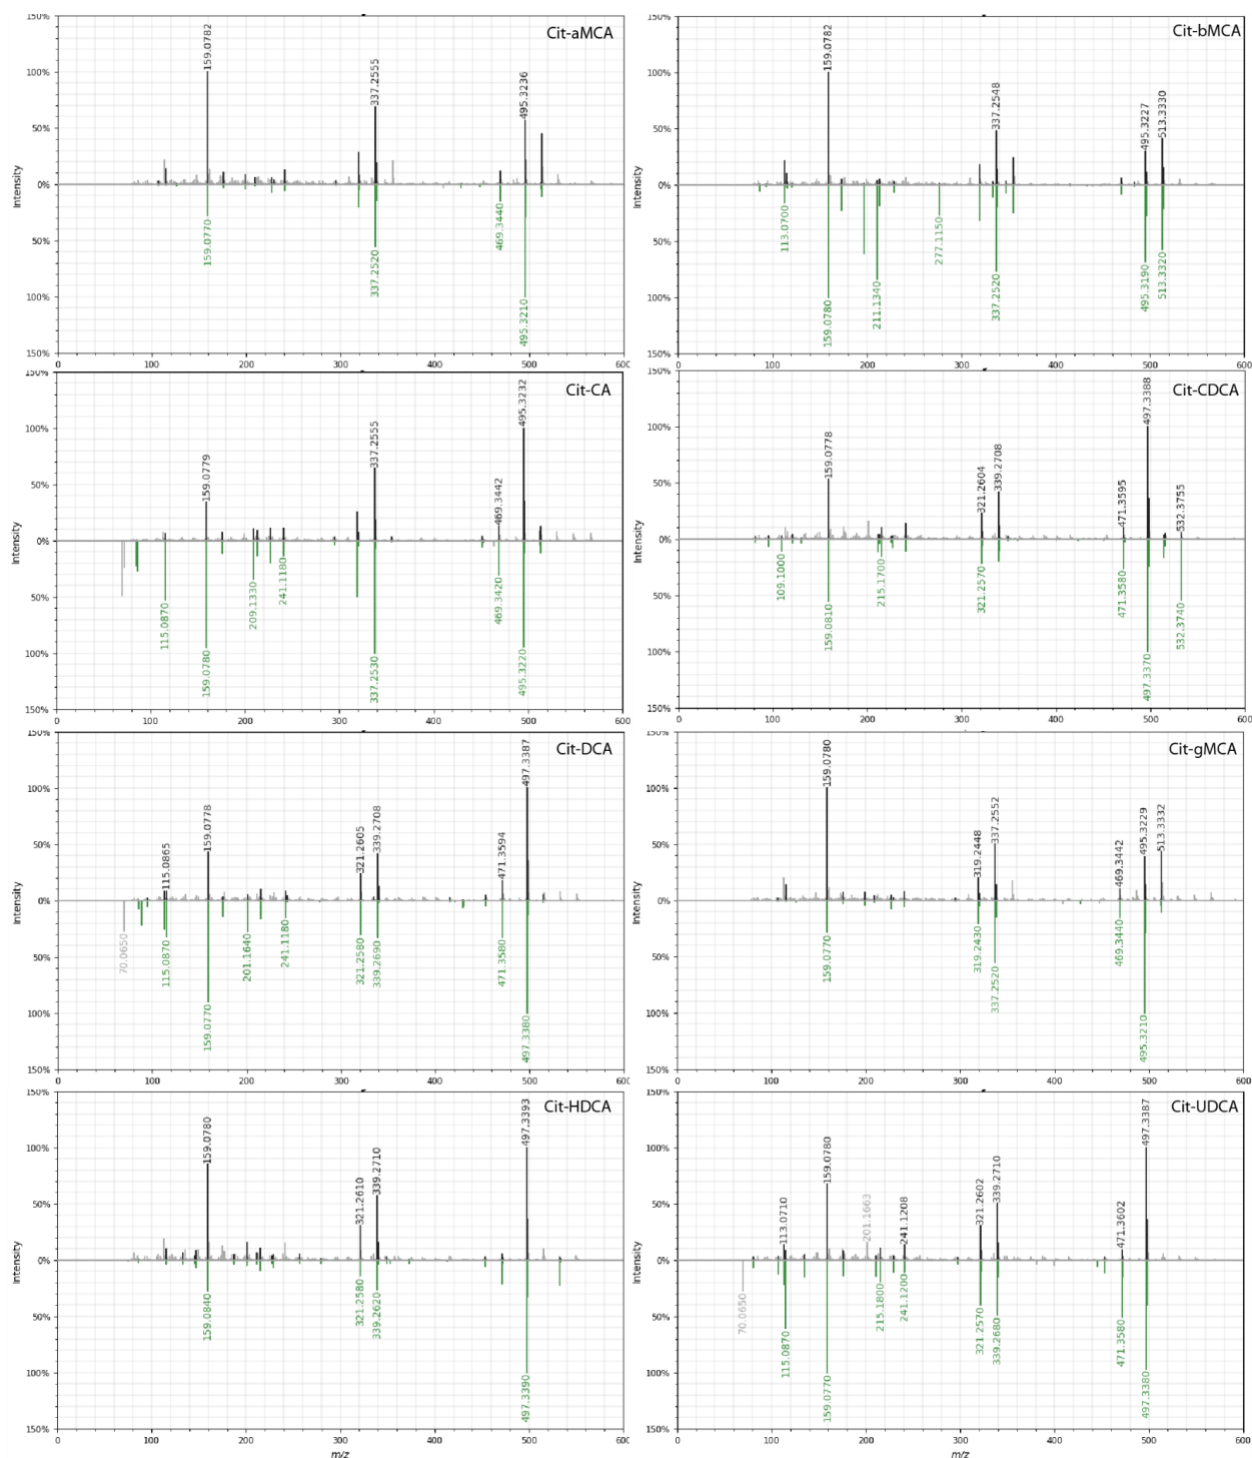

**Supplementary Fig. 6: Mirror plots for MS/MS matches to Cit conjugated bile acids.**

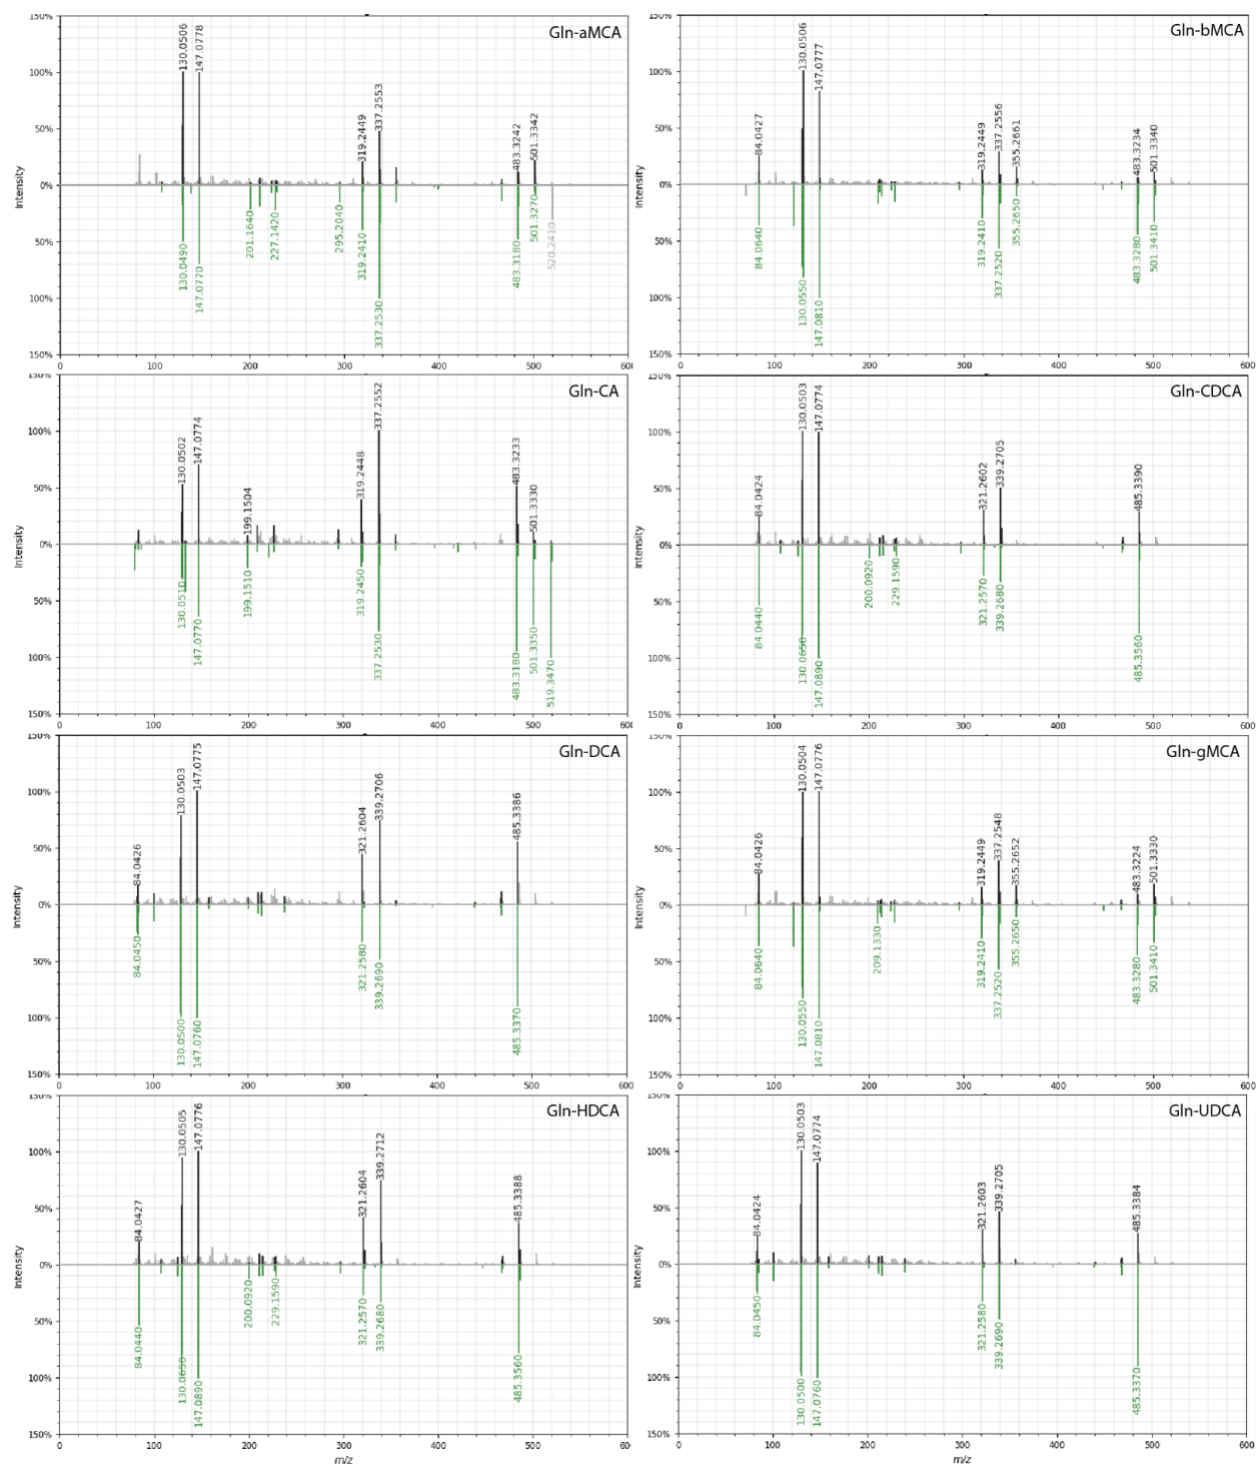

**Supplementary Fig. 7: Mirror plots for MS/MS matches to Gln conjugated bile acids.**

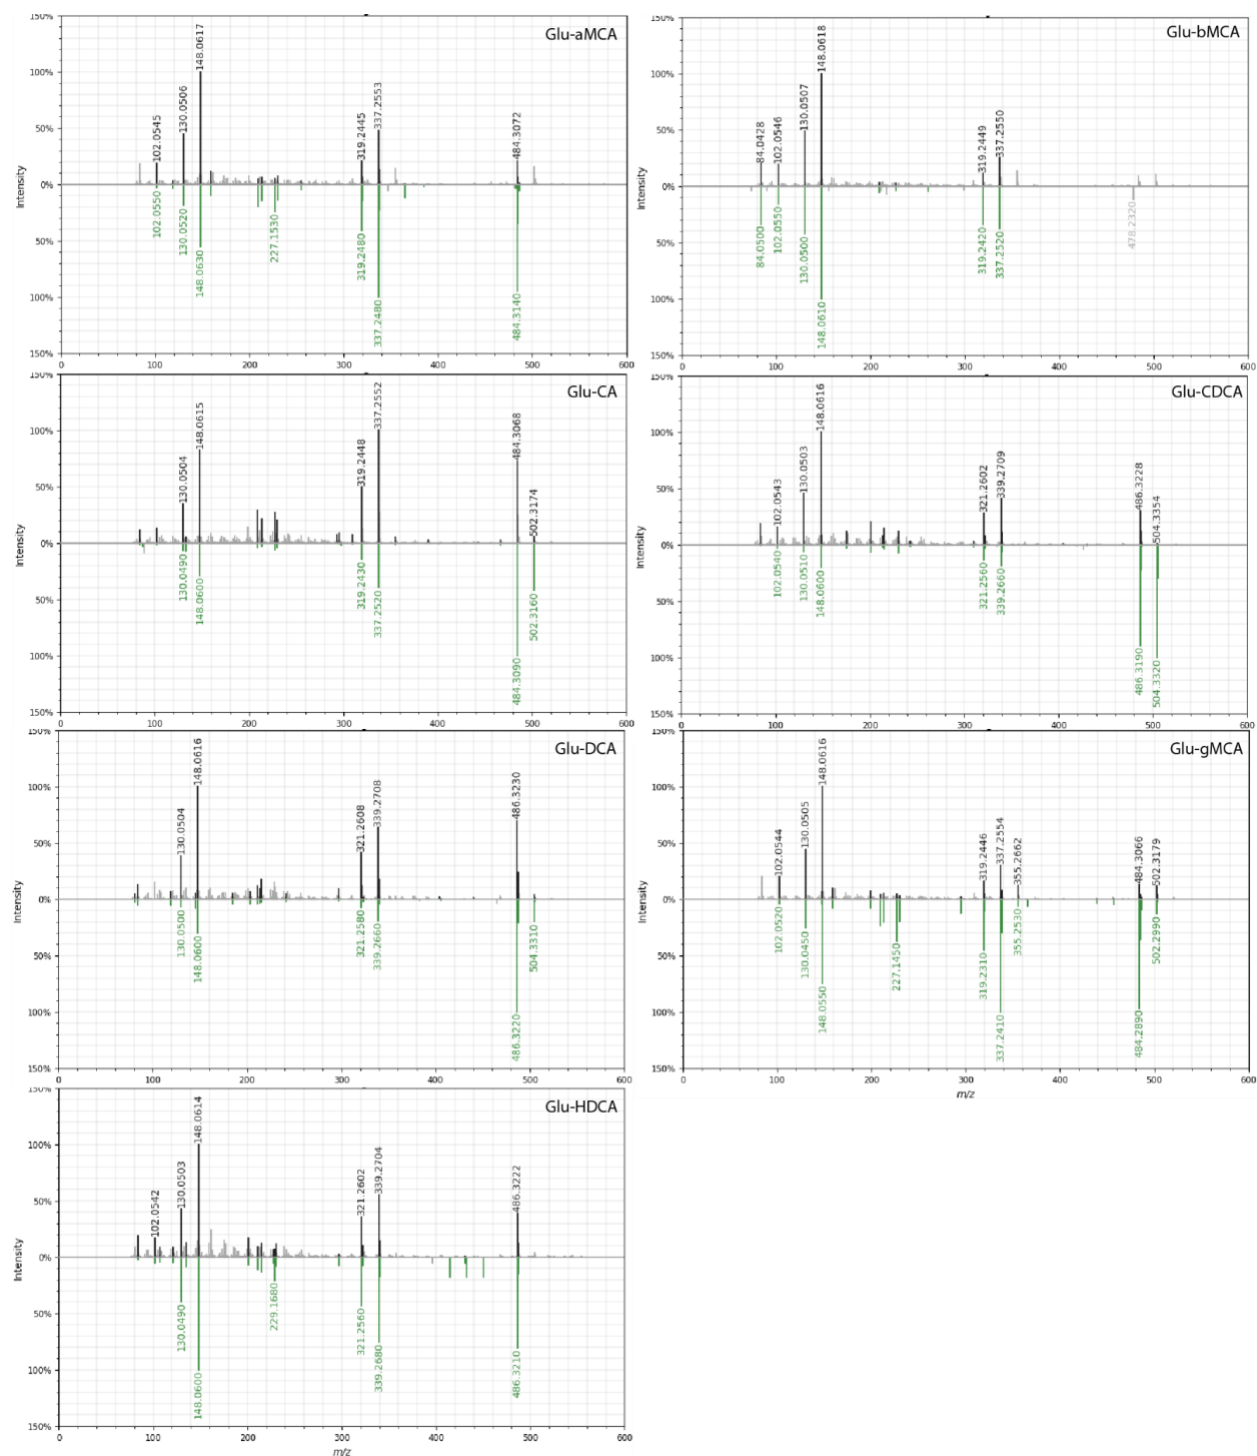

**Supplementary Fig. 8: Mirror plots for MS/MS matches to Glu conjugated bile acids.**



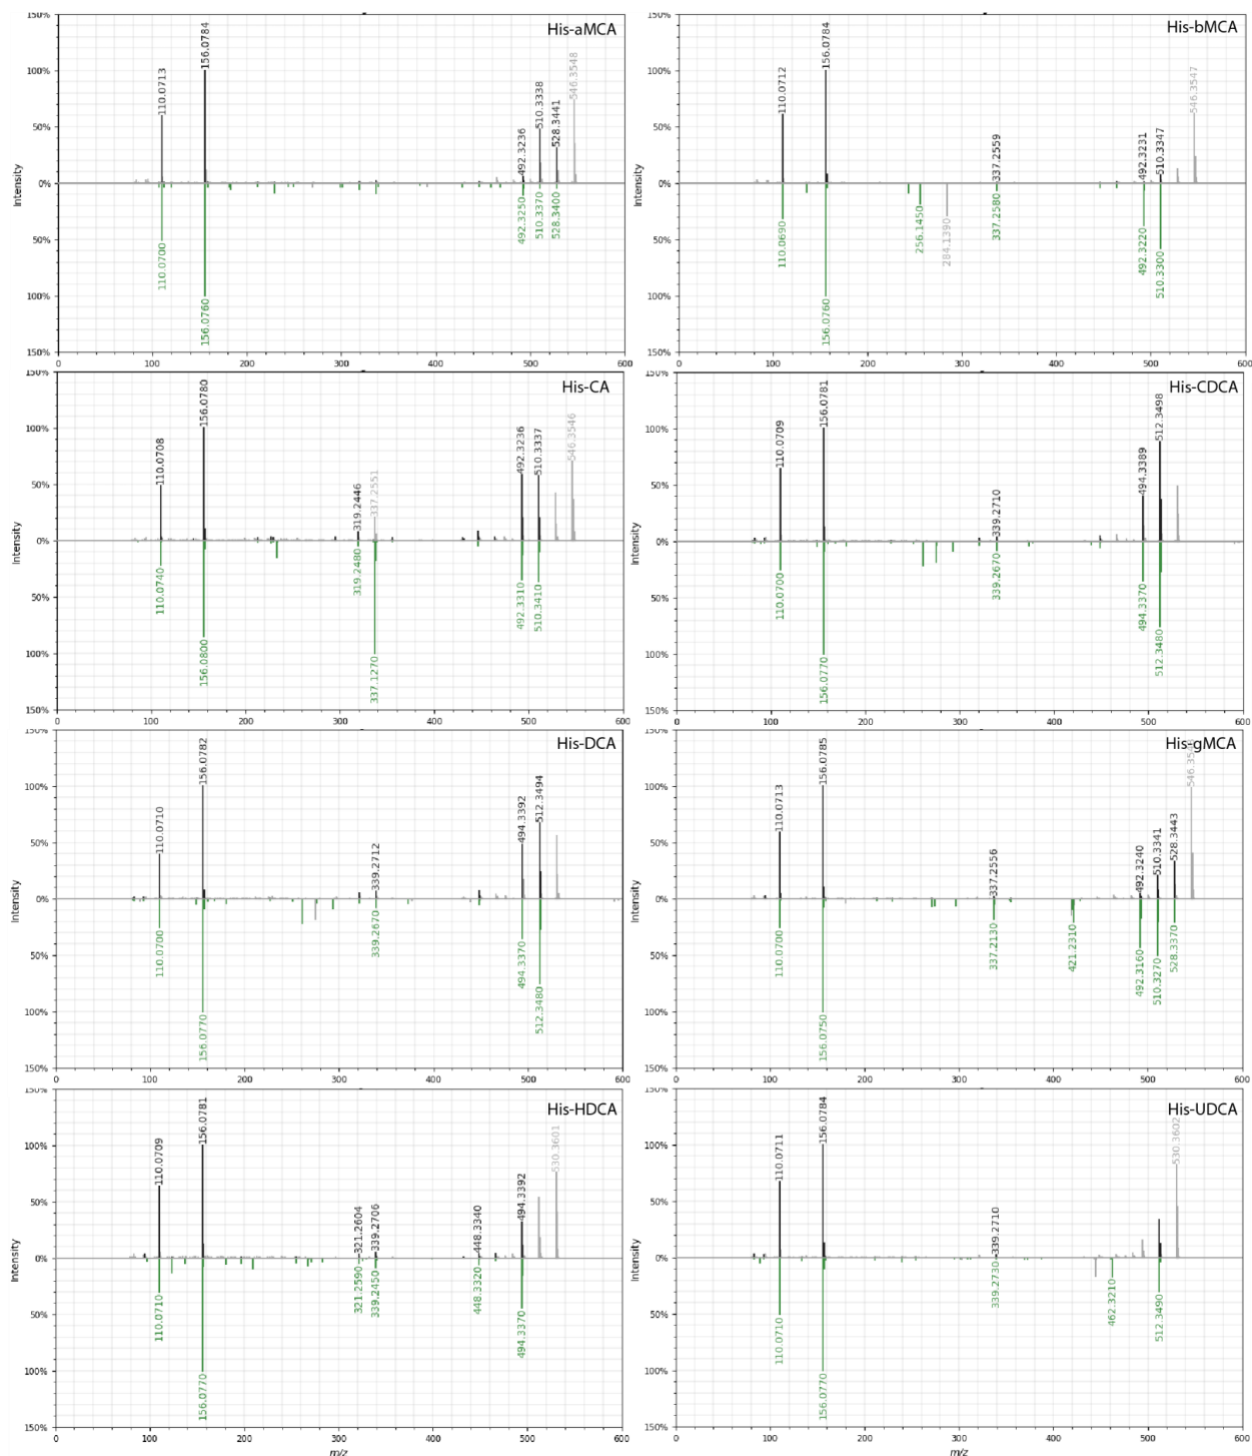

**Supplementary Fig. 9: Mirror plots for MS/MS matches to His conjugated bile acids.**

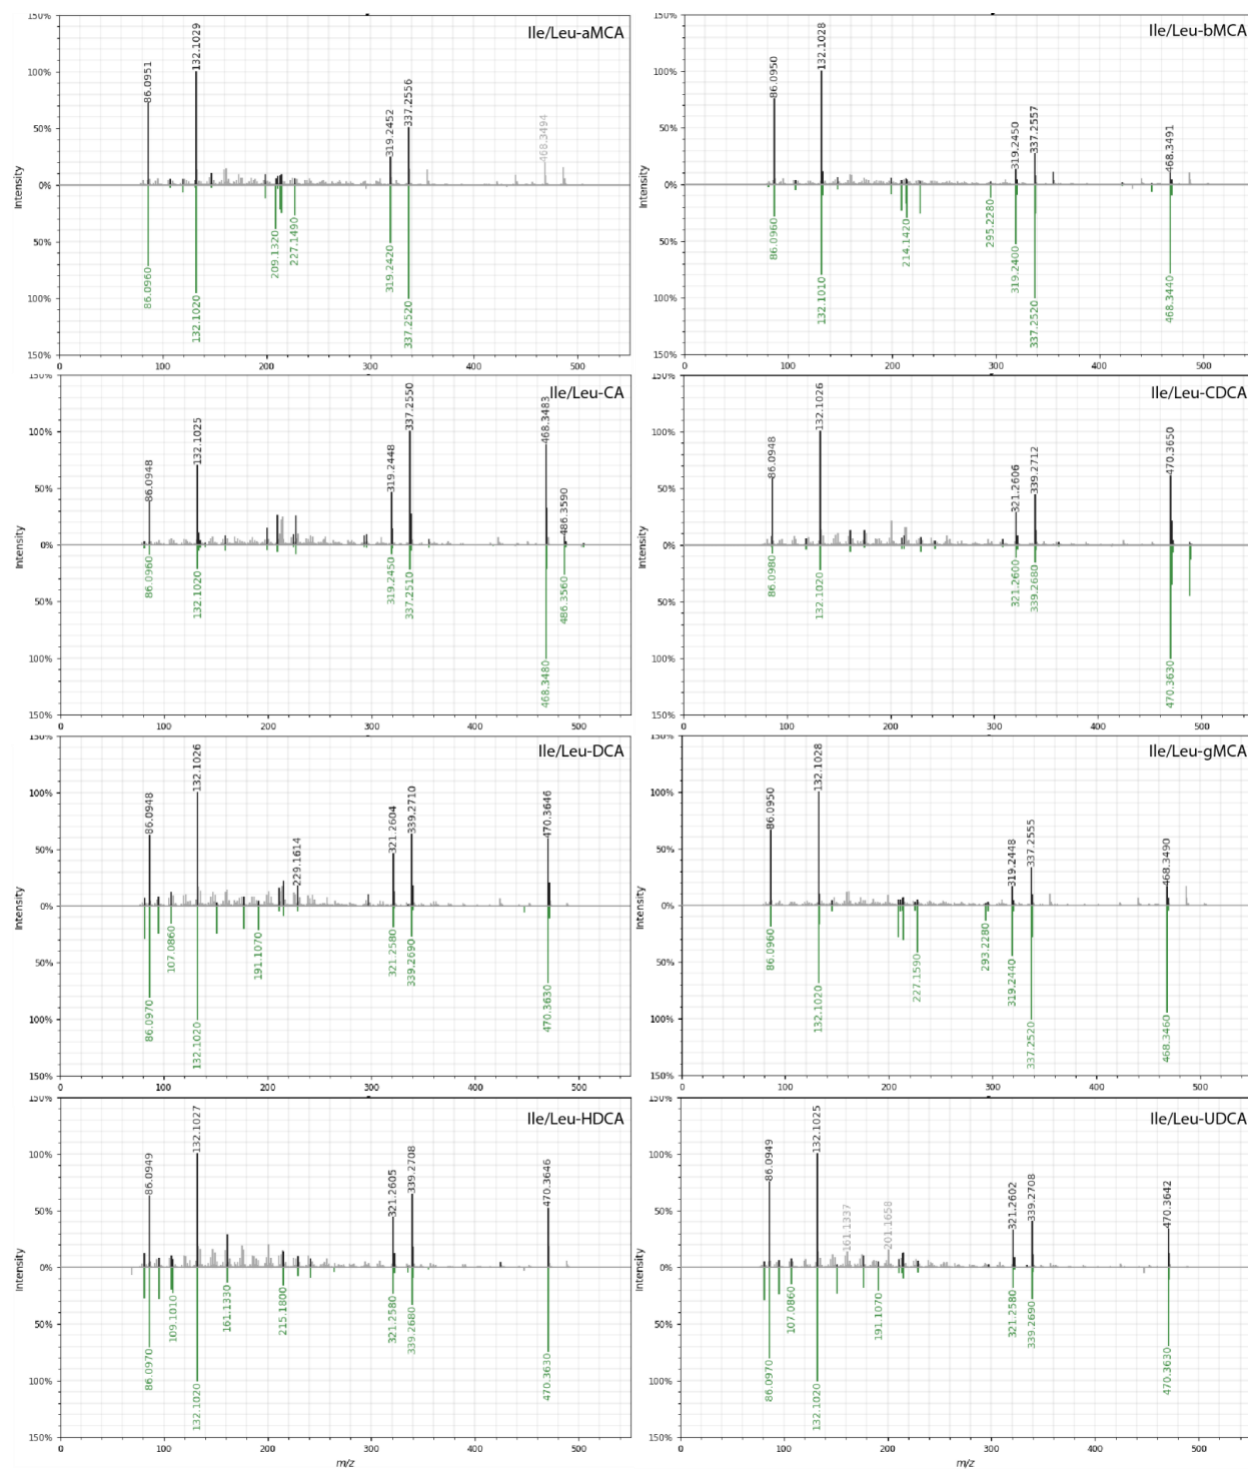

**Supplementary Fig. 10: Mirror plots for MS/MS matches to Ile/Leu conjugated bile acids.**

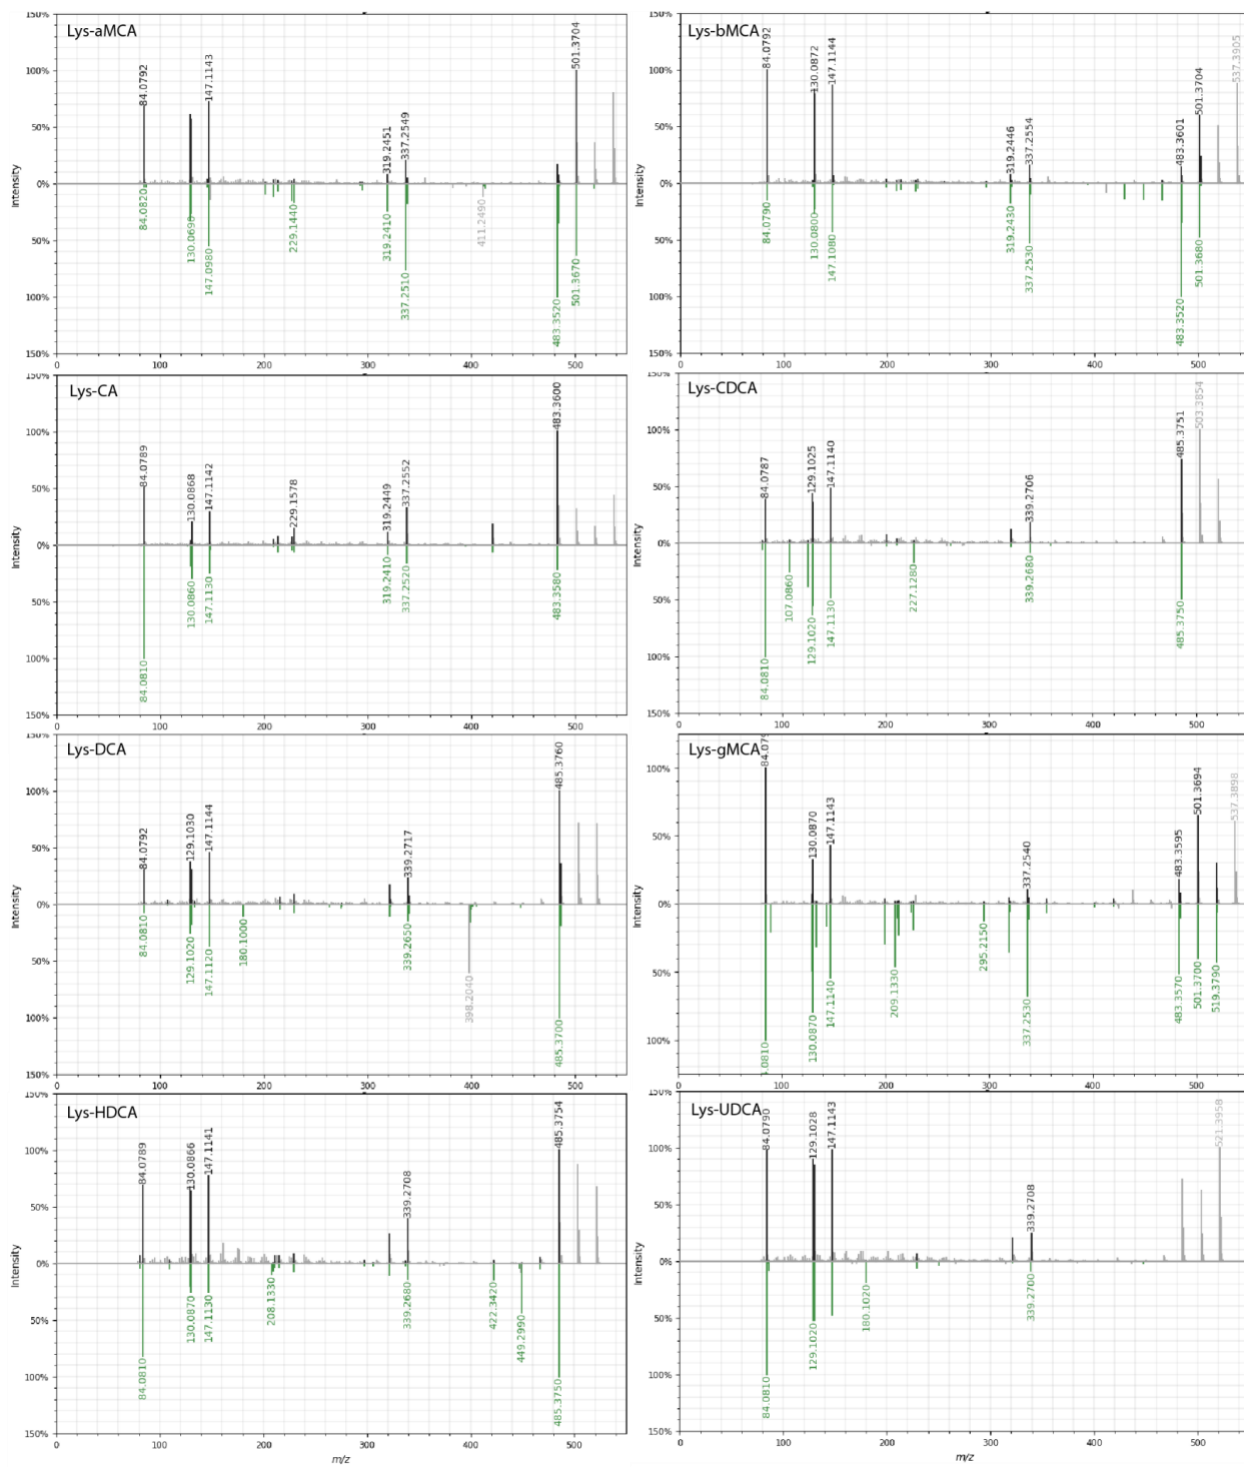

**Supplementary Fig. 11: Mirror plots for MS/MS matches to Lys conjugated bile acids.**

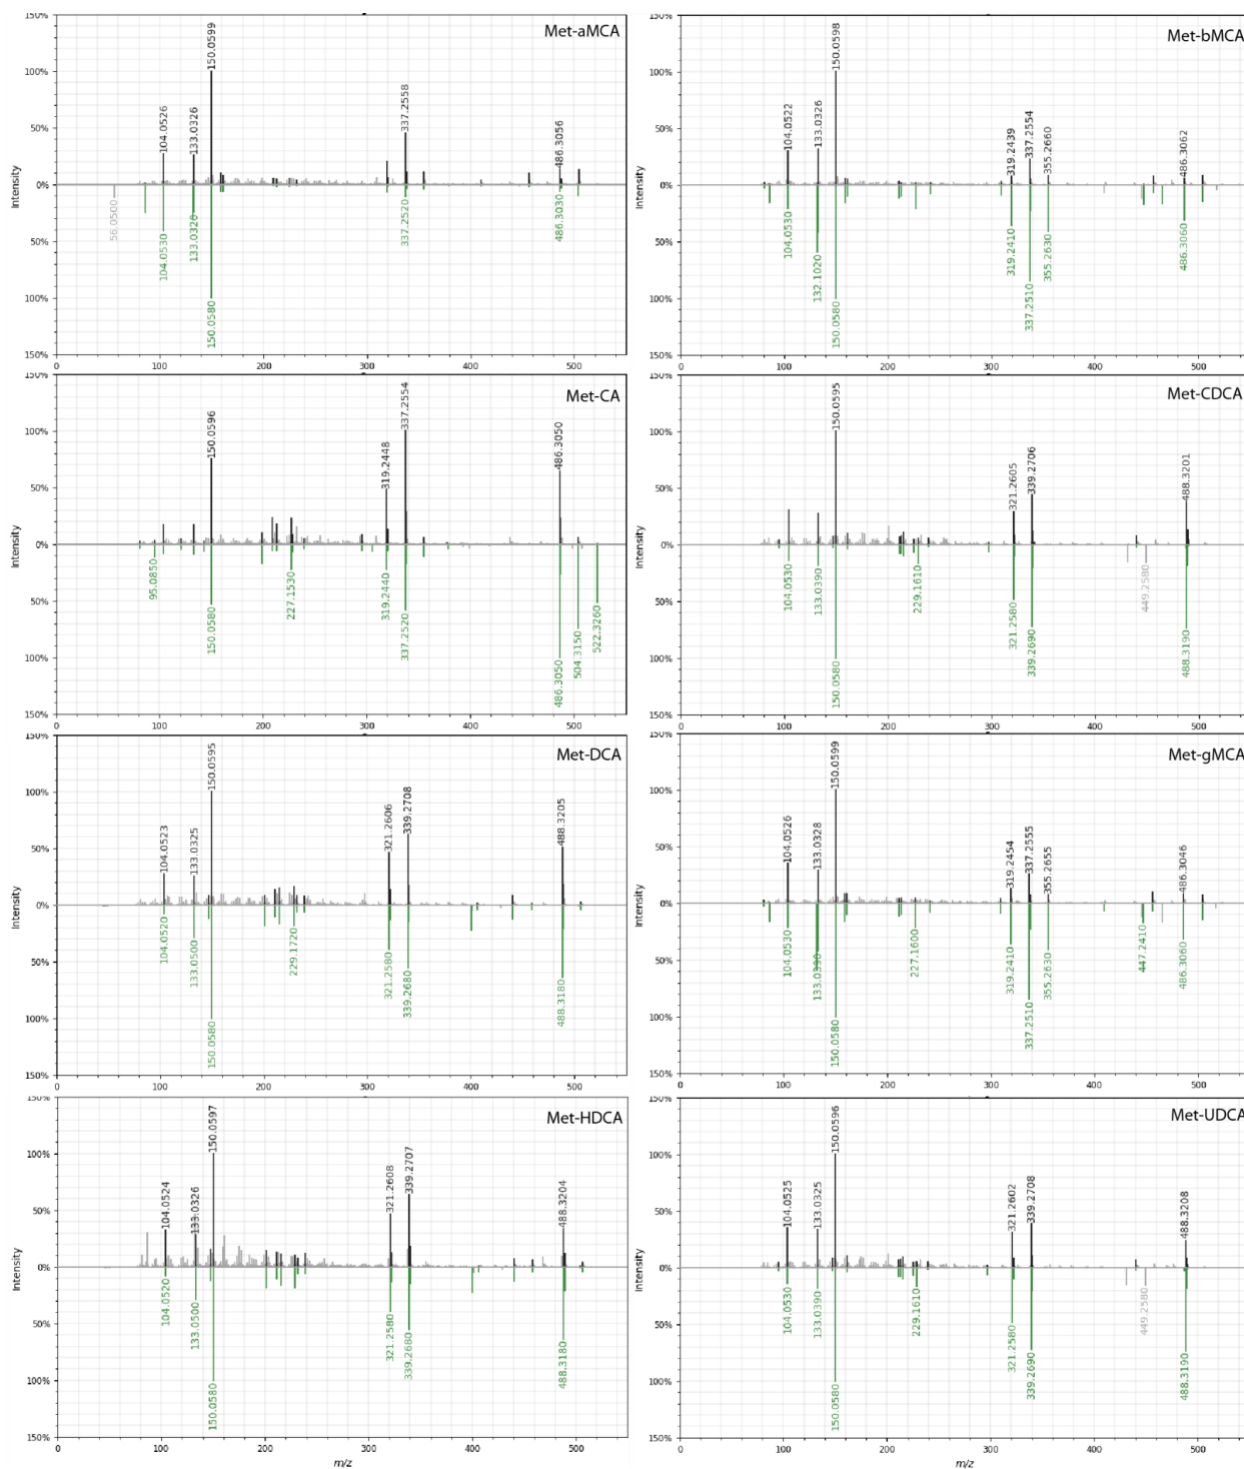

**Supplementary Fig. 12: Mirror plots for MS/MS matches to Met conjugated bile acids.**

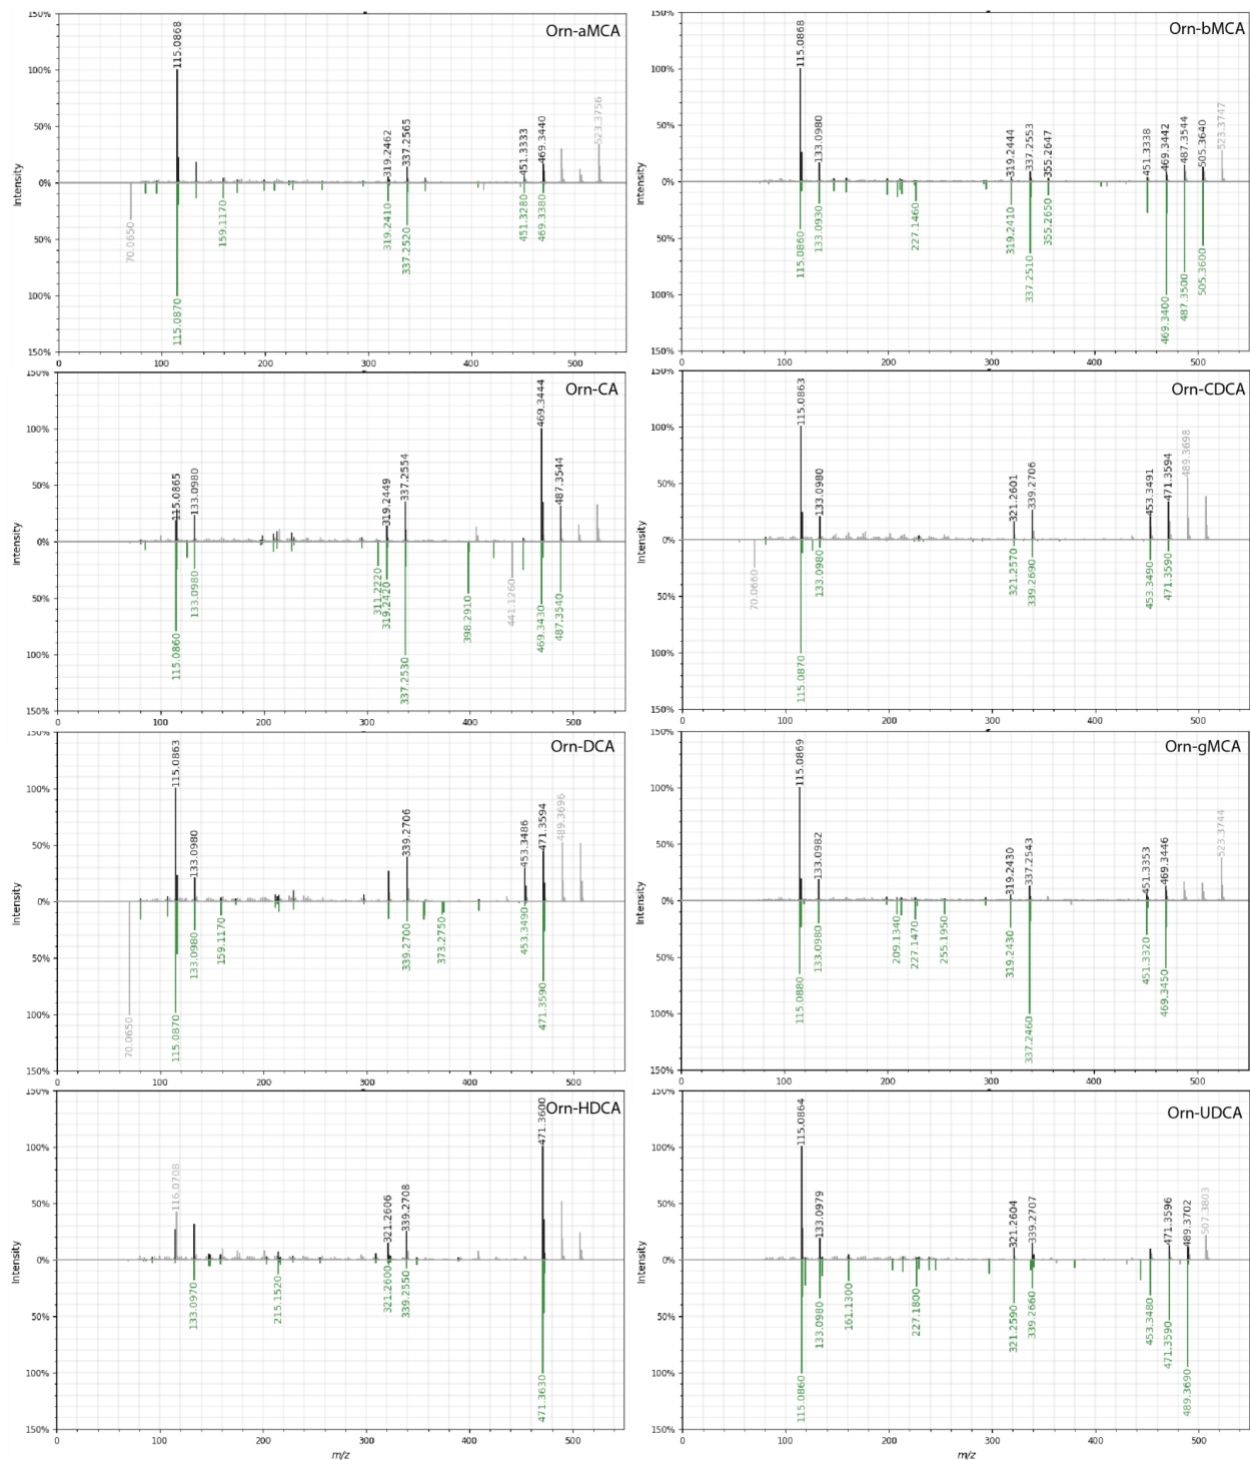

**Supplementary Fig. 13: Mirror plots for MS/MS matches to Orn conjugated bile acids.**

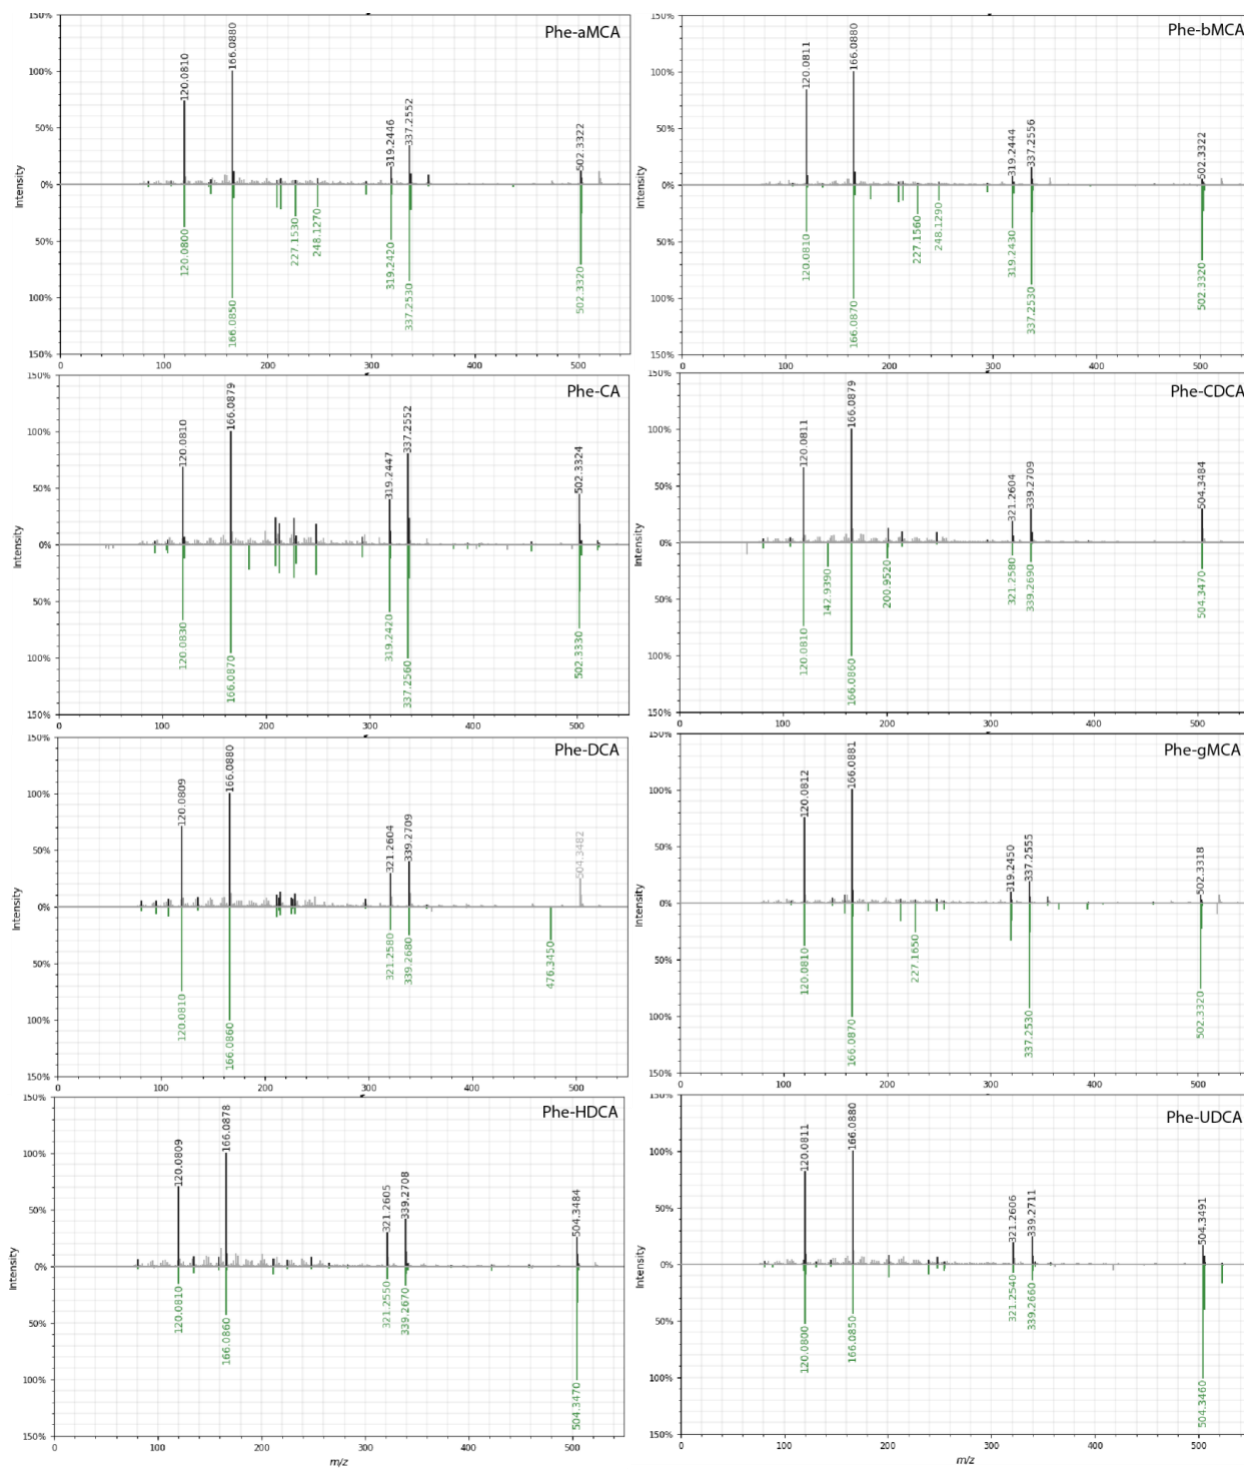

**Supplementary Fig. 14: Mirror plots for MS/MS matches to Phe conjugated bile acids.**

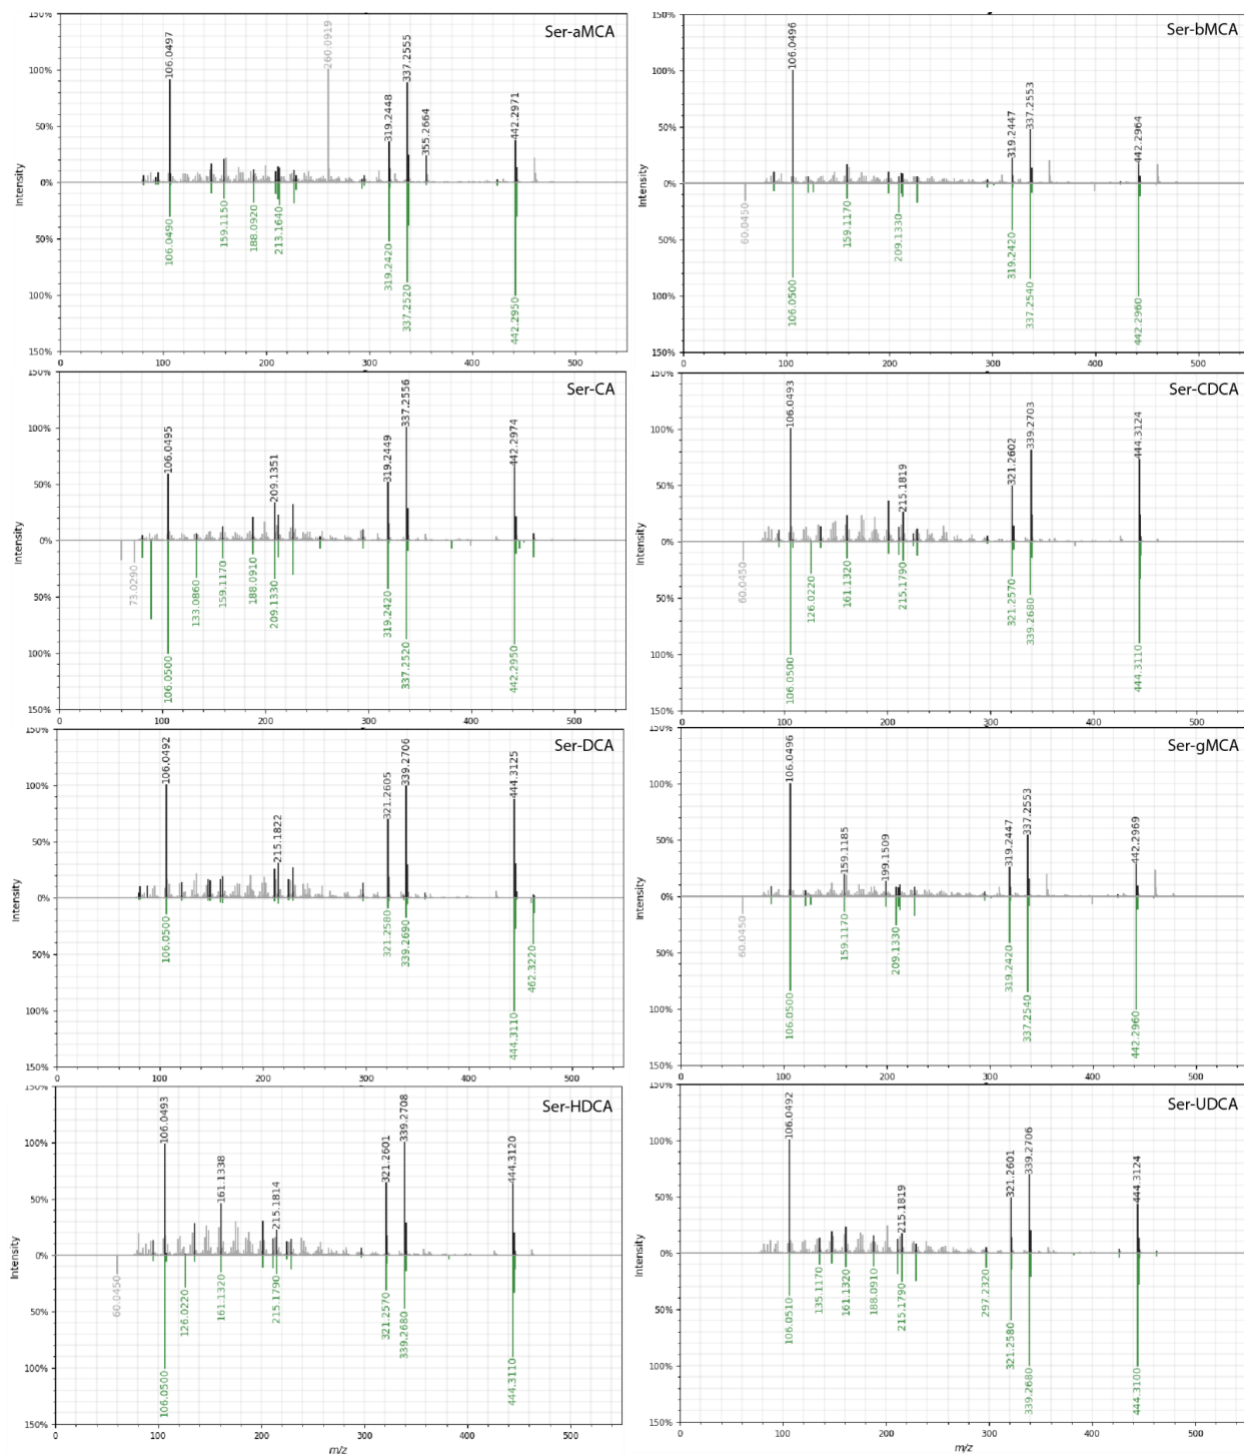

**Supplementary Fig. 15: Mirror plots for MS/MS matches to Ser conjugated bile acids.**

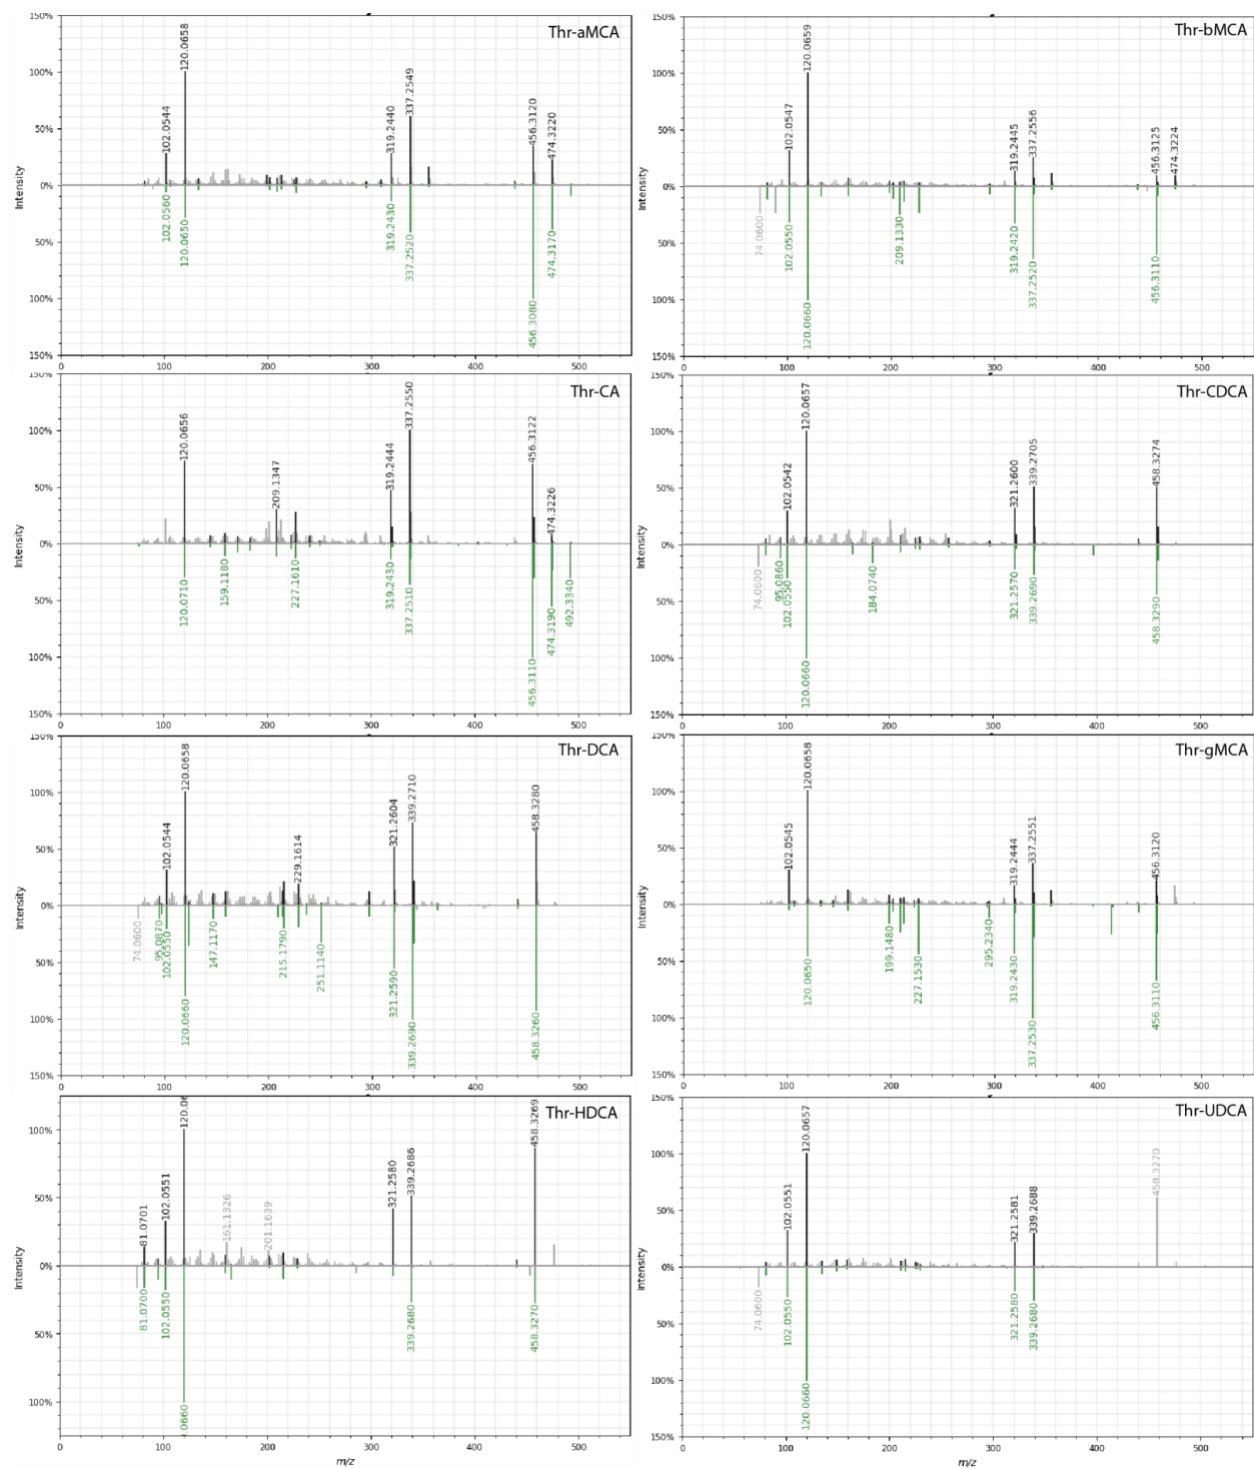

**Supplementary Fig. 16: Mirror plots for MS/MS matches to Thr conjugated bile acids.**



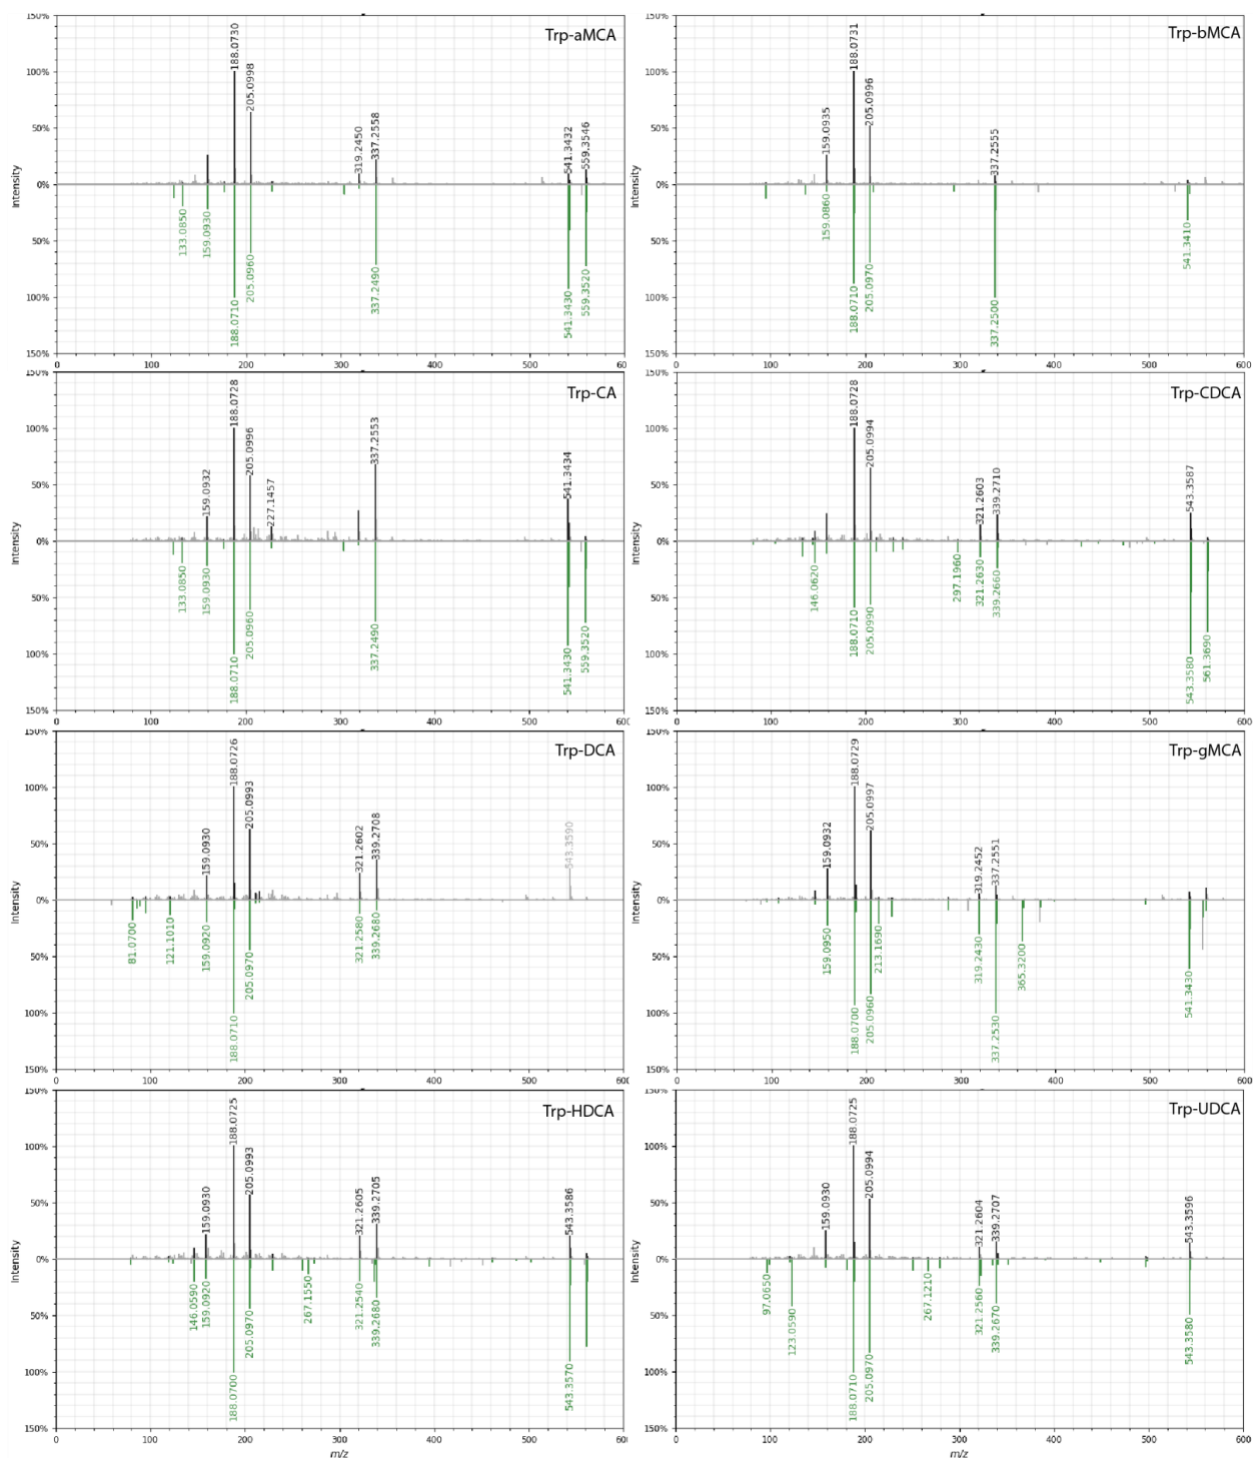

**Supplementary Fig. 17: Mirror plots for MS/MS matches to Trp conjugated bile acids.**

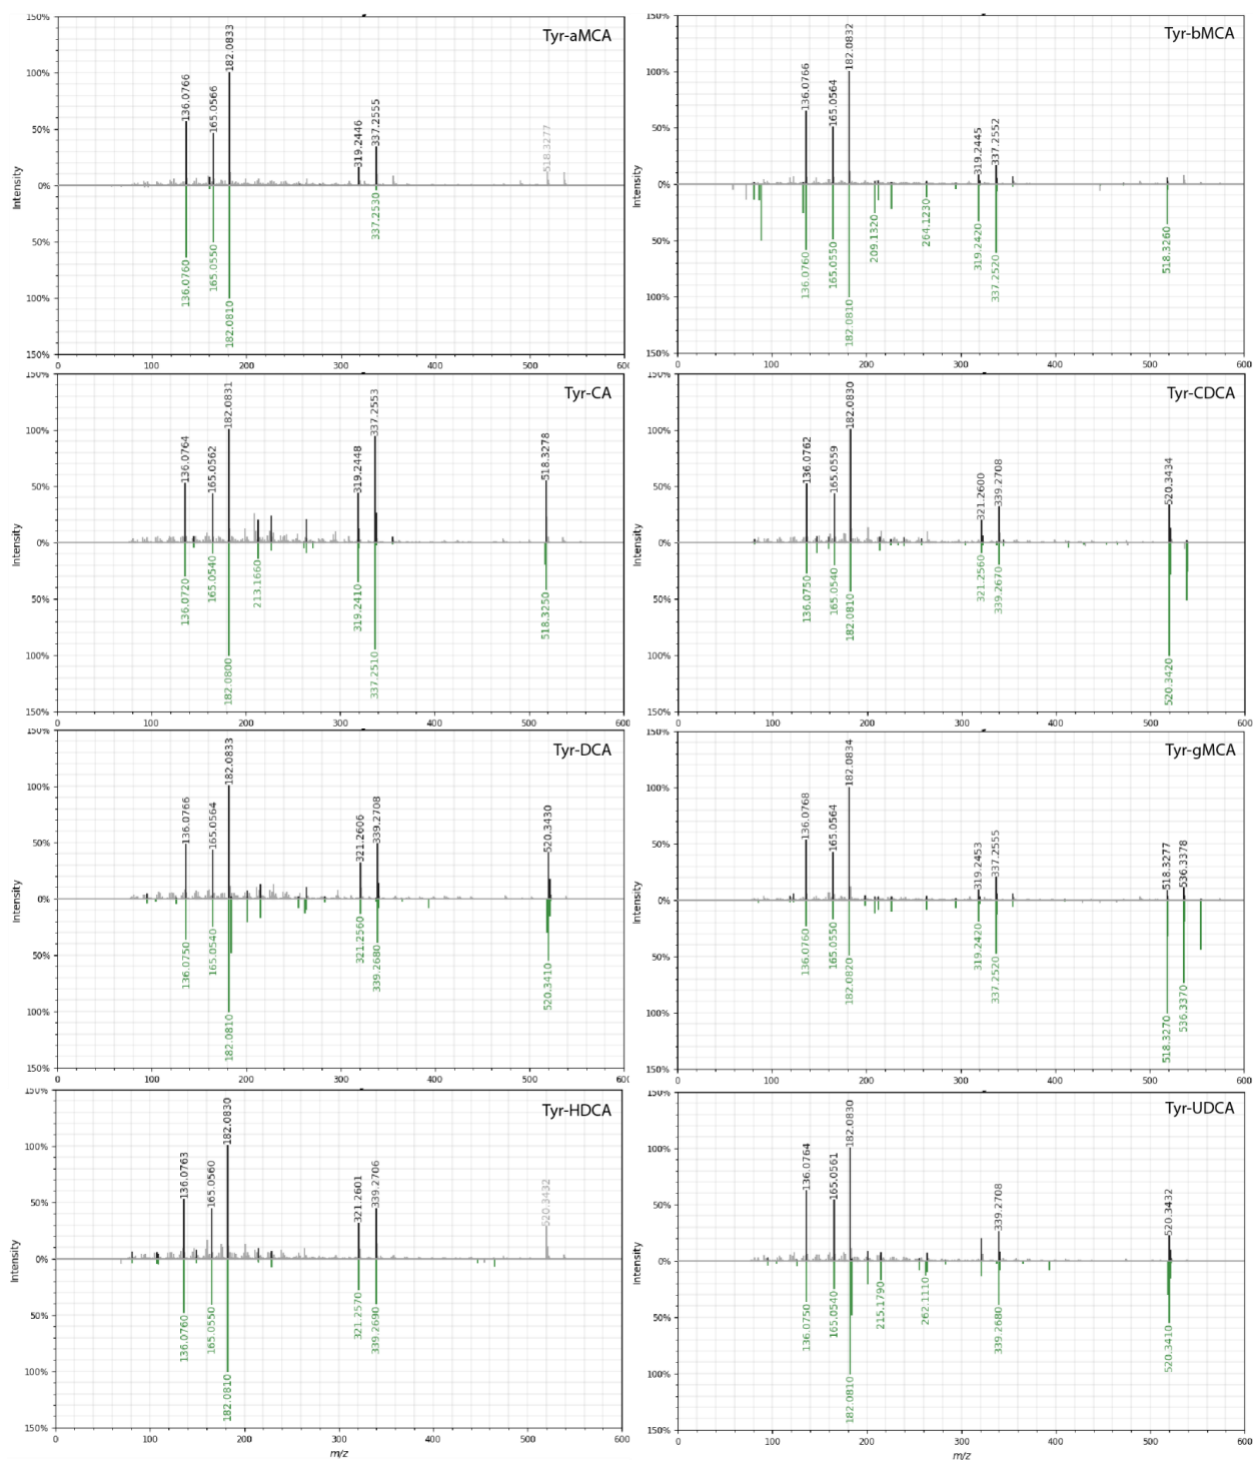

**Supplementary Fig. 18: Mirror plots for MS/MS matches to Tyr conjugated bile acids.**

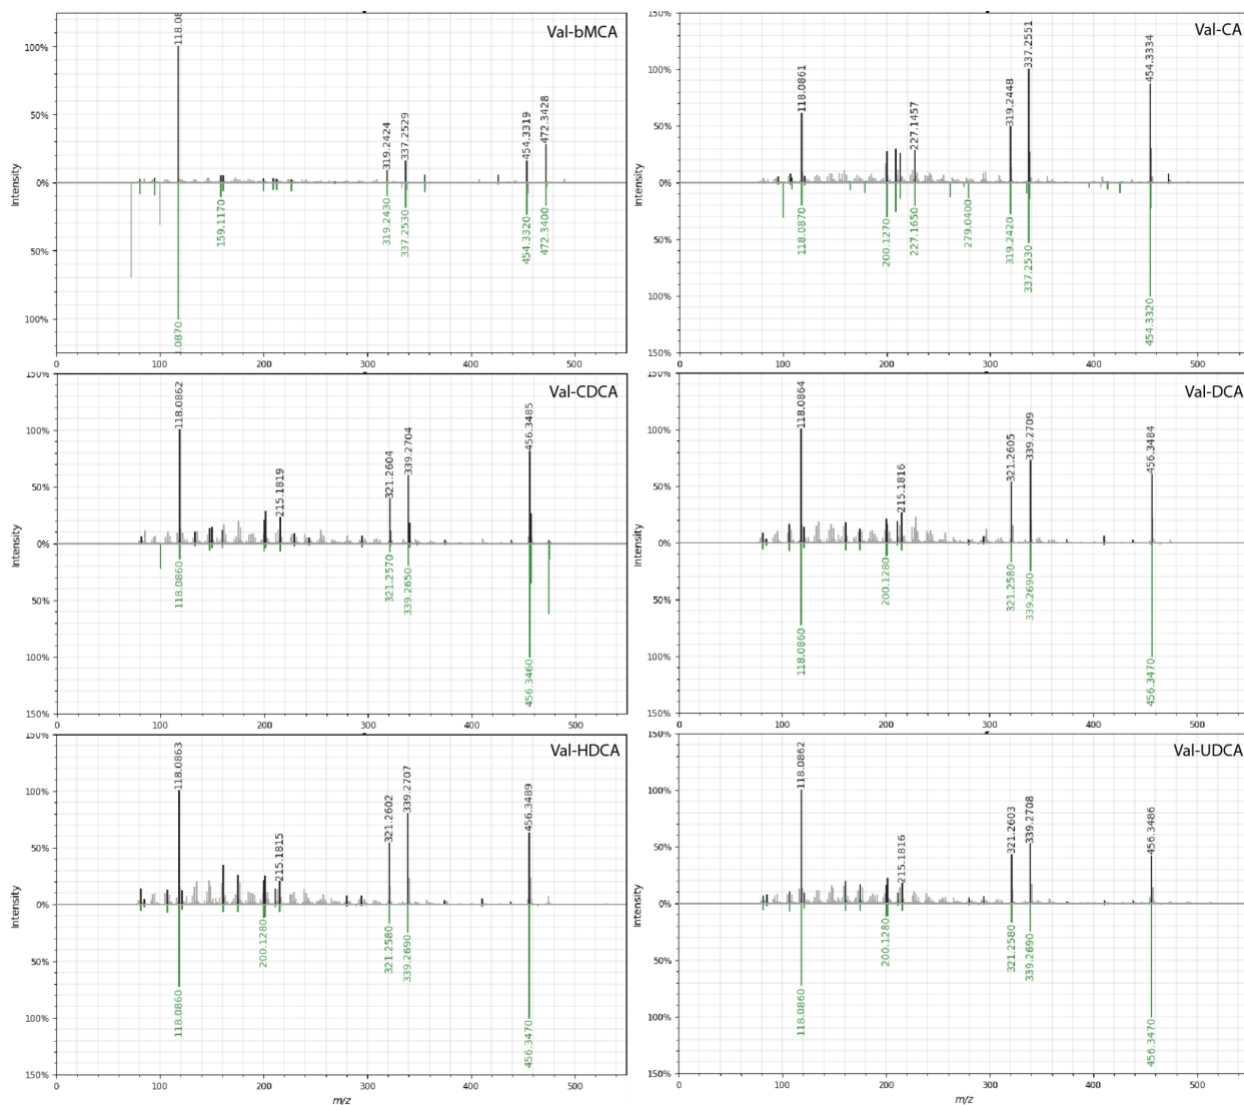

**Supplementary Fig. 19: Mirror plots for MS/MS matches to Val conjugated bile acids.**

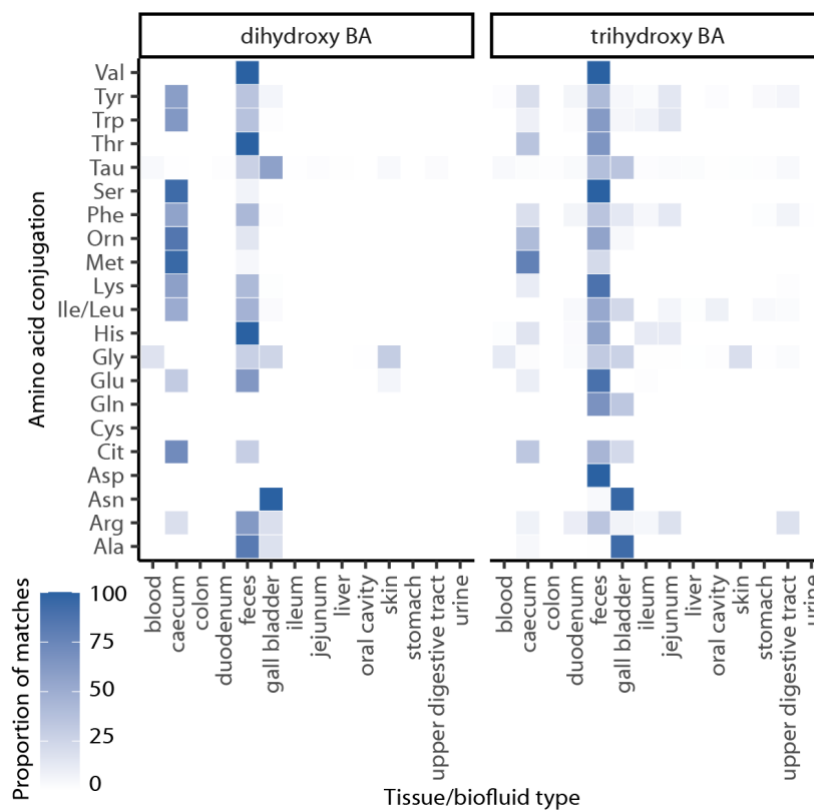

**Supplementary Fig. 20: Proportion of spectral matches per bile acid across tissue types and biofluids, faceted by number of hydroxyl groups.** Each row or amino acid conjugation was binned and summed to one.

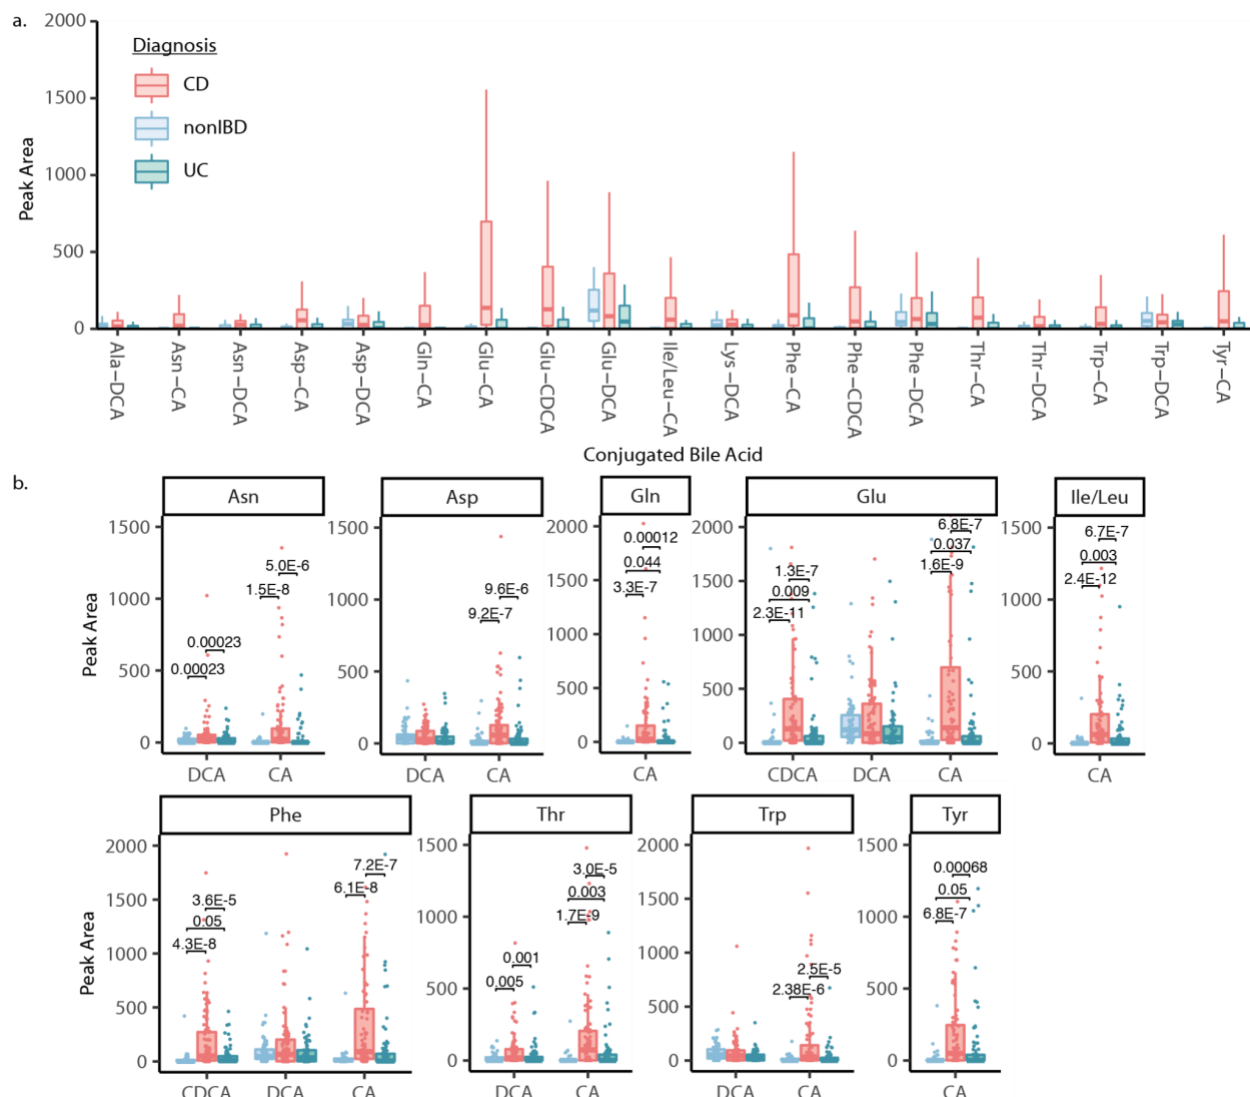

**Supplementary Fig. 21: Independent validation of new conjugated bile acids in PRISM human IBD cohort.** a) Peak area abundances of conjugated bile acids detected in longitudinal PRISM dataset.<sup>6</sup> Boxes represent the interquartile range, center line is the median and whiskers are 1.5 times the interquartile range. b) Peak area abundances of selected bile acids that were higher in Crohn's and/or Ulcerative Colitis patients relative to non-IBD individuals, as determined by pairwise two-sided Wilcoxon tests. Significance is shown using Benjamini-Hochberg corrected p-values (n for CD = 68, n for non-IBD = 34 and n for UC = 53).









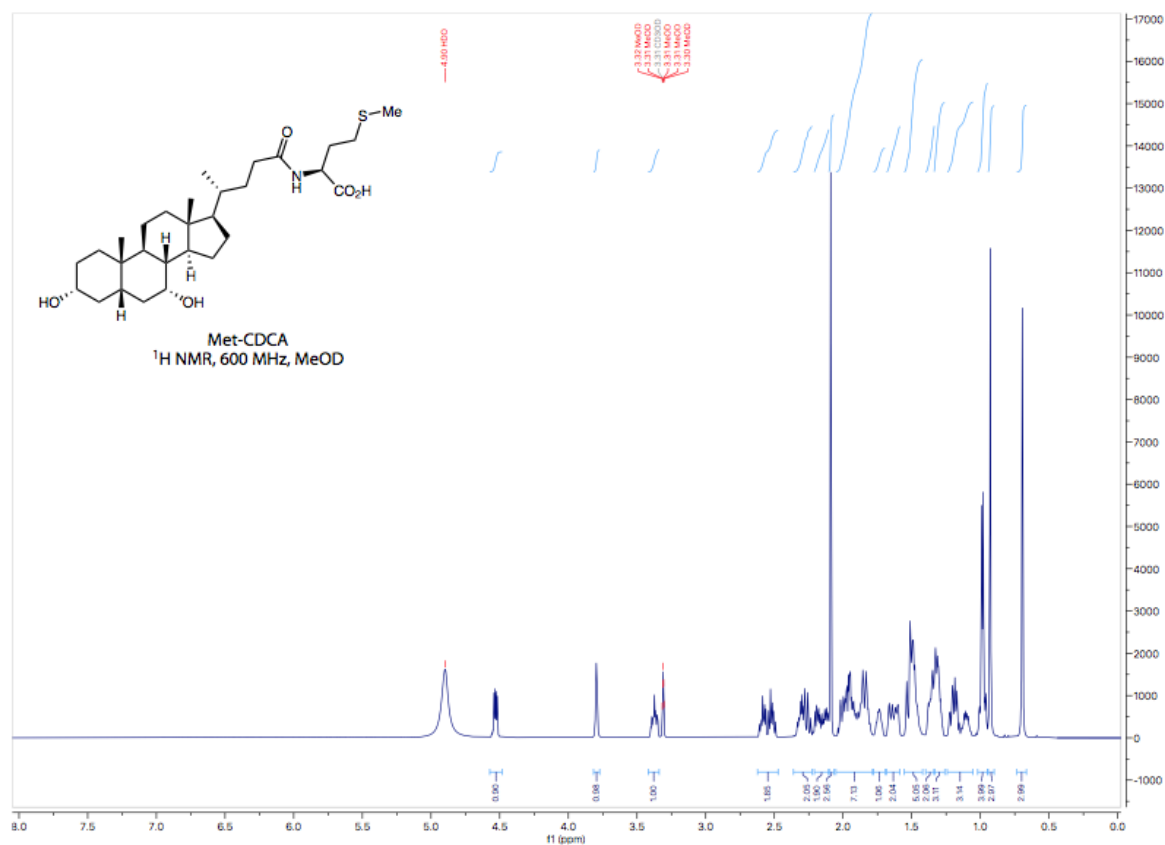

346

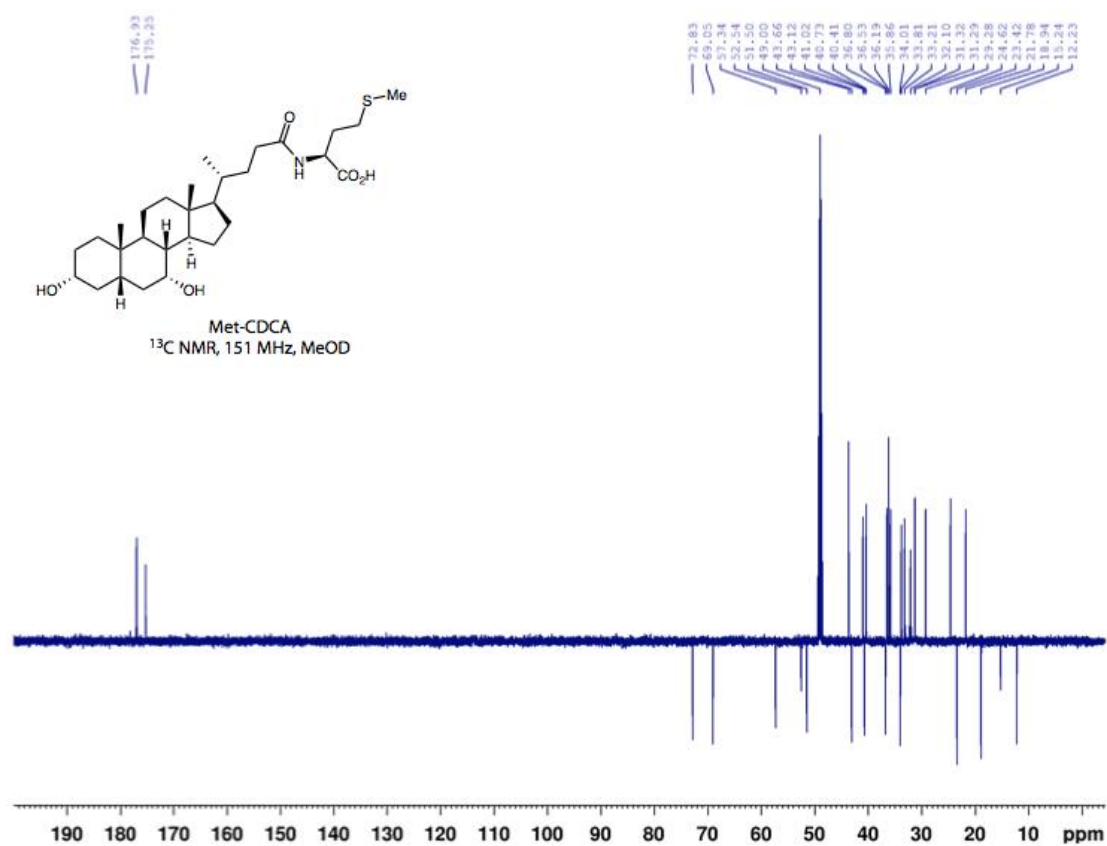

347





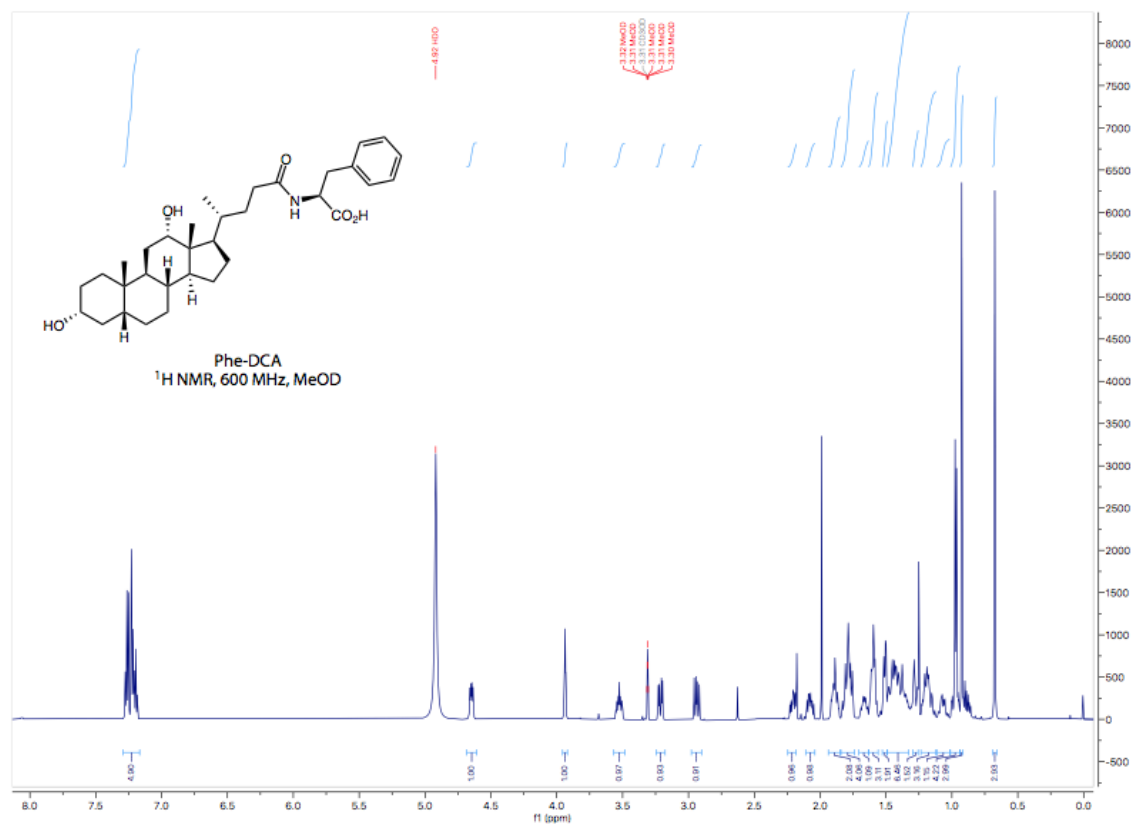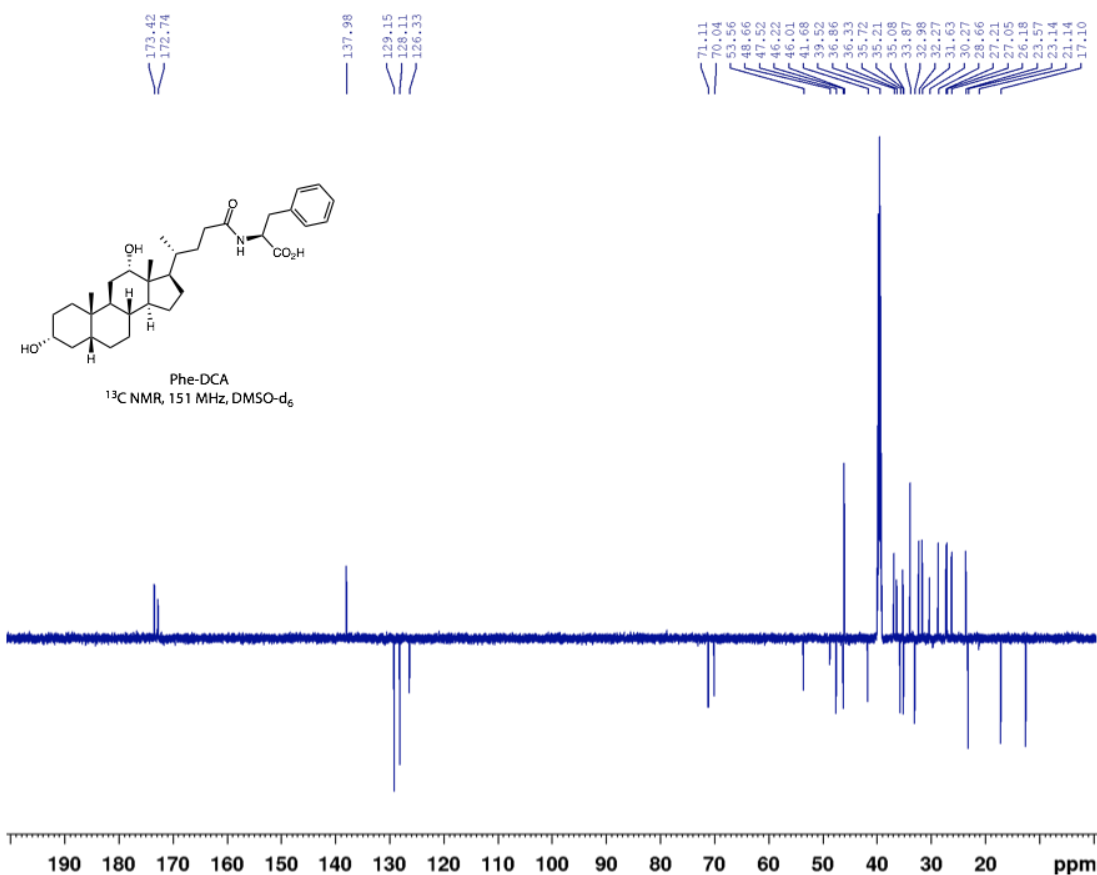



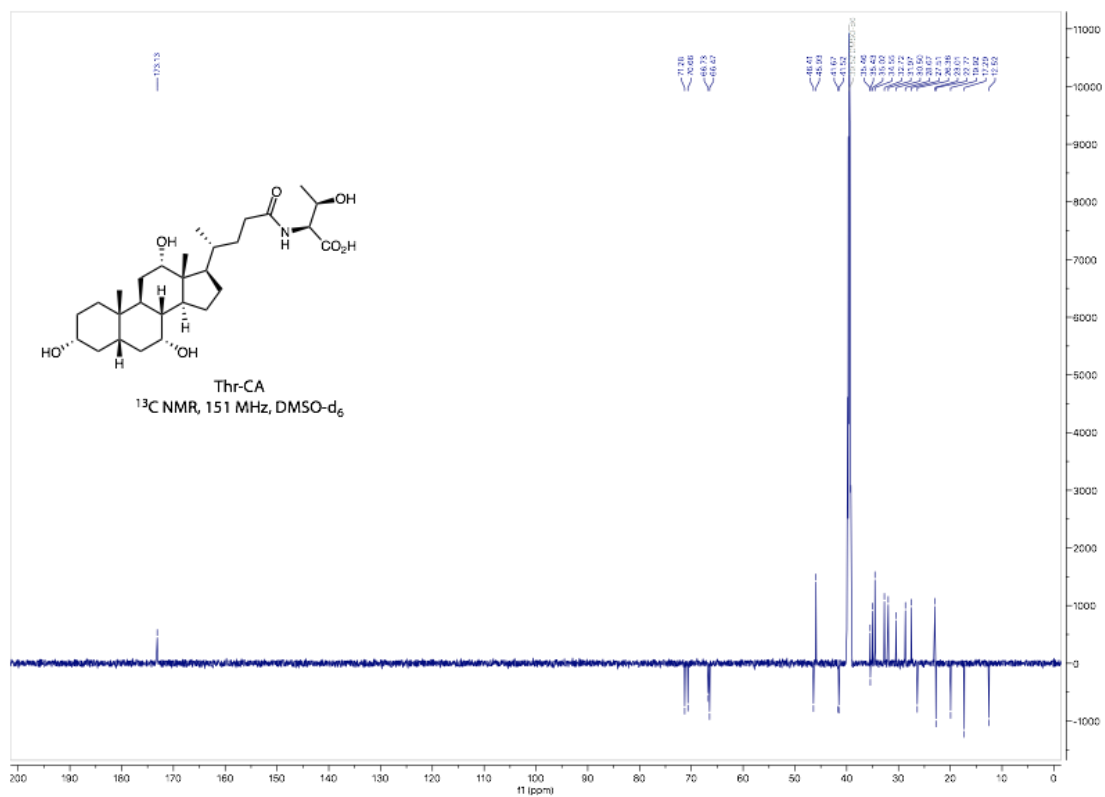

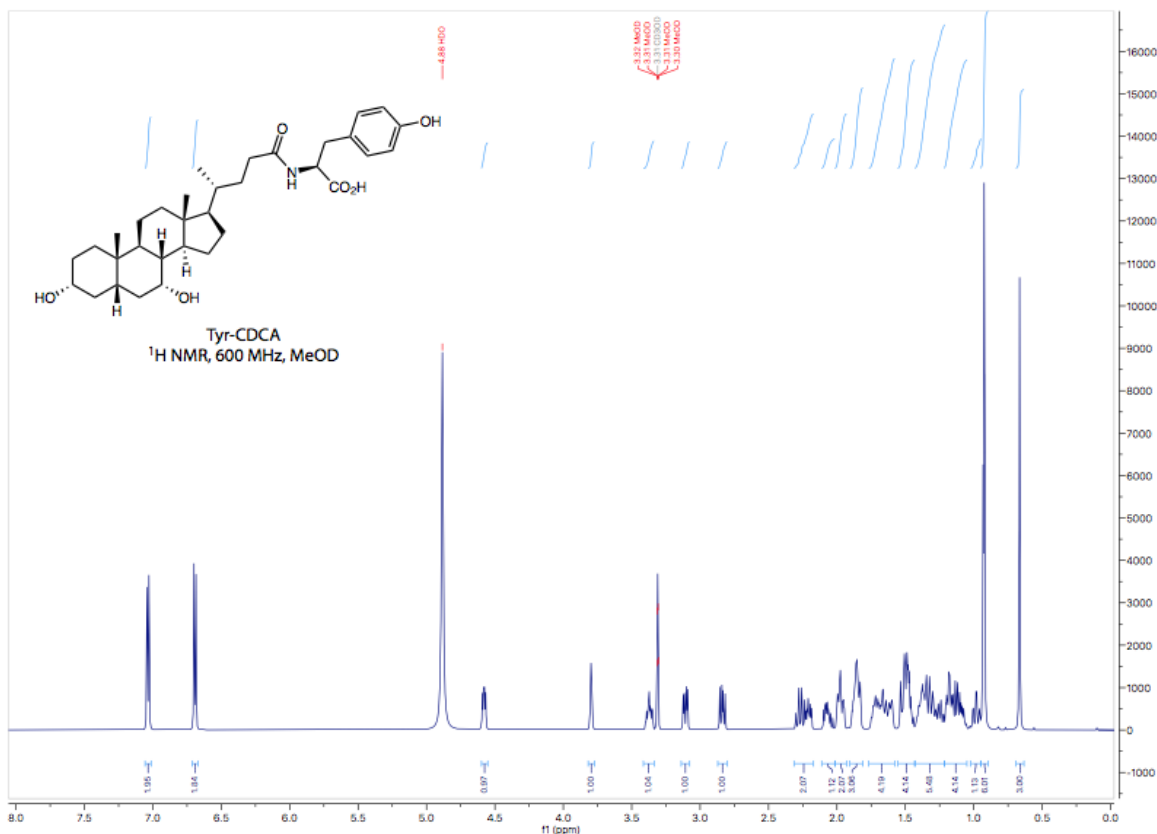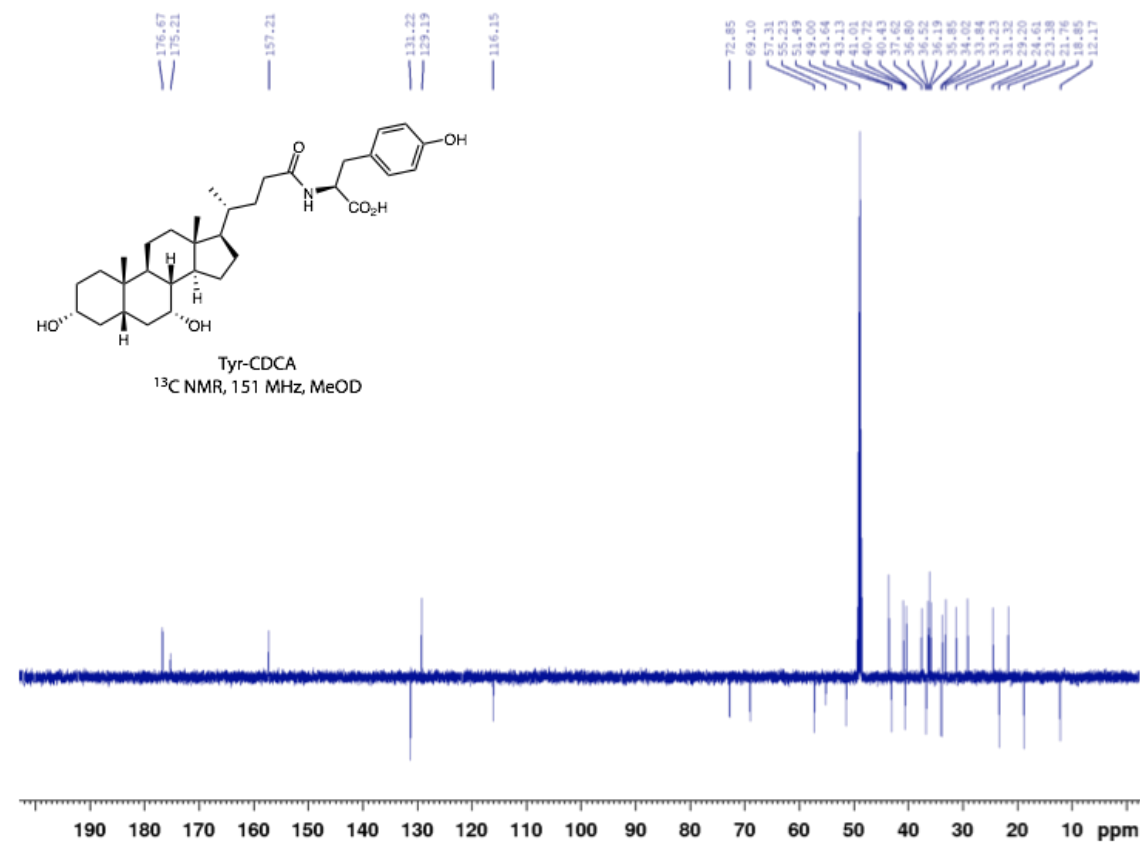

## Supplementary References

1. McDonald, J. A. K. et al. Evaluation of microbial community reproducibility, stability and composition in a human distal gut chemostat model. *J. Microbiol. Methods* 95, 167–174 (2013).
2. Katajamaa, M., Miettinen, J. & Oresic, M. MZmine: toolbox for processing and visualization of mass spectrometry based molecular profile data. *Bioinforma. Oxf. Engl.* 22, 634–636 (2006).
3. Pluskal, T., Castillo, S., Villar-Briones, A. & Orešič, M. MZmine 2: Modular framework for processing, visualizing, and analyzing mass spectrometry-based molecular profile data. *BMC Bioinformatics* 11, 395 (2010).
4. Quinn, R. A. et al. Global chemical effects of the microbiome include new bile-acid conjugations. *Nature* 579, 123–129 (2020).
5. Wang, M. et al. Interactive MS/MS Visualization with the Metabolomics Spectrum Resolver Web Service. *bioRxiv* 2020.05.09.086066 (2020) doi:10.1101/2020.05.09.086066.
6. Franzosa, E. A. et al. Gut microbiome structure and metabolic activity in inflammatory bowel disease. *Nat. Microbiol.* 4, 293–305 (2019).
